# Supplementary material
Source: publisher figshare collection journal article supplement (https://gsajournals.figshare.com/articles/dataset/_/14900463)
Supplement: Supplementary file 1 [file 1]

## Sheet: Sheet 1
The Pseudoalteromonas multipartite genome: Distribution and expression of pangene categories, and a hypothesis for the origin and evolution of the chromid
Cecilie Bækkedal Sonnenberg and Peik Haugen
Supplementary File S2
Sheet 2 contains data for the chromosome. Row D - AB contains raw number of core, softcore, shell and cloud genes in each section in 25 Pseudoalteromonas genomes. Row AF - BD show log10 ratio of: The probability of a gene belonging to a sector (#Genes in a sector/#Total numer of genes) / The probability given an equal distribution of genes between all sectors (1/#sectors). Row BH-BI show Log10 ra…
Sheet 3 contains data for the chromid. Row D - AB contains raw number of core, softcore, shell and cloud genes in each section in 25 Pseudoalteromonas genomes. Row AF - BD Log10 ratio of: The probability of a gene belonging to a sector (#Genes in a sector/#Total numer of genes) / The probability given an equal distribution of genes between all sectors (1/#sectors) Row BJ shows log10 ratio of: the…
Cells with black boarders indicate significant differences in number of genes between sectors based on Kruskal-Wallis and Dunn´s test P-value < 0.05. See File S3 for more details. Positive values (shades of orange) suggest that gene categories are overrepresented, whereas negative values (shades of blue) suggest underrepresentation.

## Sheet: Sheet 2
Chromosome
Raw number of core, softcore, shell and cloud genes in each section in 25 Pseudoalteromonas genomes																													Log10 ratio of: The probability of a gene belonging to a sector (#Genes in a sector/#Total numer of genes) / The probability given an equal distribution of genes between all sectors (1/#sectors)
4 sectors																													4 sectors
Pangene category	Sectors		P. fuliginea Bsw20308	P. sp. 1_2015MBL_MicDiv	P. aliena EH1	P. arctica A 37-1-2	P. translucida KMM 520	P. translucida TAC125	P. nigrifaciens KMM 661	P. agarivorans DSM 14585	P. espejiana DSM 9414 ATCC 29659	P. sp. SM9913	P. tetraodonis GFC	P. issachenkonii KMM 3549	P. issachenkonii KCTC 12958	P. sp. 13-15	P. phenolica KCTC 12086	P. sp. NC201	P. piscicida DE2-B	P. rubra SCSIO 6842	P. luteoviolacea S4054	P. luteoviolacea S4054249	P. luteoviolacea S40542	P. tunicata D2	P. spongiae UST010723-006	P. spongiae SAO4-4	P. piratica OCN003		Pangene category	Sectors	P. fuliginea Bsw20308	P. sp. 1_2015MBL_MicDiv	P. aliena EH1	P. arctica A 37-1-2	P. translucida KMM 520	P. translucida TAC125	P. nigrifaciens KMM 661	P. agarivorans DSM 14585	P. espejiana DSM 9414 ATCC 29659	P. sp. SM9913	P. tetraodonis GFC	P. issachenkonii KMM 3549	P. issachenkonii KCTC 12958	P. sp. 13-15	P. phenolica KCTC 12086	P. sp. NC201	P. piscicida DE2-B	P. rubra SCSIO 6842	P. luteoviolacea S4054
Core	1		360	307	383	301	334	324	344	331	316	332	332	338	338	304	314	349	369	428	421	420	421	335	295	284	297		Core	1	0.046764	-0.0227359	0.0713154	-0.0319785	0.0132015	-0.000334975	0.023674	0.0102895	-0.0101872	0.0105931	0.0119356	0.0173675	0.0187069	-0.0266649	-0.0102513	0.0390347	0.0632357	0.120899	0.113402
	2		282	338	304	319	301	332	309	310	320	304	292	304	303	308	276	274	334	237	262	263	262	348	336	354	292			2	-0.0592894	0.0190424	-0.0290098	-0.00675433	-0.0319785	0.0102581	-0.0229259	-0.0181768	-0.00472431	-0.0276714	-0.0438197	-0.0286756	-0.0287671	-0.0209878	-0.0662719	-0.0660401	0.0199558	-0.135797	-0.0925787
	3		295	283	290	291	279	270	259	304	317	357	357	351	351	312	335	301	291	315	233	227	228	271	363	336	328			3	-0.0397165	-0.0580878	-0.0494854	-0.046652	-0.0649408	-0.0795162	-0.0995847	-0.0266649	-0.00881502	0.0421232	0.0434657	0.033758	0.0350973	-0.0153839	0.0178638	-0.0252242	-0.0398977	-0.0122345	-0.143524
	4		356	366	323	385	382	371	391	348	341	303	311	306	303	369	361	352	282	316	381	386	386	346	276	301	354			4	0.0419115	0.0536068	-0.00268084	0.0749157	0.0715184	0.0584939	0.0792923	0.0320407	0.0228801	-0.0291024	-0.0164421	-0.0258277	-0.0287671	0.0574878	0.0503262	0.042752	-0.0535416	-0.0108579	0.070045
		Total number of genes	1293	1294	1300	1296	1296	1297	1303	1293	1294	1296	1292	1299	1295	1293	1286	1276	1276	1296	1297	1296	1297	1300	1270	1275	1271
Softcore	1		404	374	445	366	396	379	405	381	378	386	397	377	377	371	351	400	411	486	489	488	489	366	348	337	338		Softcore	1	0.047373	0.00761426	0.0807456	-0.00266167	0.0315524	0.0136774	0.0424932	0.0180376	0.0122345	0.0195609	0.03147	0.00872691	0.0104935	0.00411657	-0.0122001	0.0424526	0.064532	0.124046	0.120814
	2		316	369	333	356	331	367	336	343	352	338	321	338	337	344	306	313	364	268	294	294	294	388	375	394	350			2	-0.0593213	0.00176902	-0.0451702	-0.0146928	-0.0463148	-0.00029574	-0.0386225	-0.0275933	-0.0187147	-0.0381097	-0.0608155	-0.0386977	-0.0382179	-0.0286989	-0.0717858	-0.0640631	0.0117915	-0.134455	-0.100148
	3		323	317	325	321	310	298	288	337	353	400	402	392	392	345	365	329	316	343	269	262	263	290	393	364	359			3	-0.0498059	-0.0641981	-0.0557311	-0.0596377	-0.0747811	-0.0907455	-0.105569	-0.0352575	-0.0174826	0.0350336	0.0369055	0.0256716	0.0274382	-0.0274382	0.00478566	-0.0424115	-0.0496228	-0.0272961	-0.138743
	4		406	410	375	430	436	425	440	401	387	352	357	371	366	410	422	409	326	364	429	436	435	410	316	342	388			4	0.0495176	0.0475265	0.00641682	0.0673257	0.0733437	0.0634271	0.0784909	0.040257	0.0224536	-0.0204837	-0.0146523	0.00175947	-0.00236673	0.0475265	0.0678052	0.0521159	-0.0360923	-0.00148884	0.0639622
		Total number of genes	1449	1470	1478	1473	1473	1469	1469	1462	1470	1476	1477	1478	1472	1470	1444	1451	1417	1461	1481	1480	1481	1454	1432	1437	1435
																								#REF!
Shell	1		356	335	307	363	294	273	298	323	330	294	313	335	335	297	255	227	284	259	559	555	557	209	253	271	266		Shell	1	-0.0208406	-0.0452062	-0.0366081	-0.000298998	-0.0134535	-0.0413204	-0.0271854	-0.0148689	-0.0113654	-0.0589603	-0.0429037	-0.0357582	-0.0360566	-0.0279602	0.0191504	-0.0496619	0.0523489	-0.0490982	-0.0812481
	2		390	376	295	320	307	325	318	310	346	376	359	385	400	322	276	260	232	301	748	750	750	209	246	254	260			2	0.018774	0.00493687	-0.0539245	-0.0550556	0.00533757	0.0344003	0.00102549	-0.0327097	0.00919679	0.0478802	0.0166464	0.0246577	0.0409586	0.00713925	0.0535193	0.00928556	-0.0354815	0.0161685	0.0452417
	3		408	412	422	433	336	328	347	367	350	339	335	348	341	348	236	270	258	300	785	776	775	194	212	196	233			3	0.0383696	0.0446462	0.101566	0.0762823	0.0445385	0.0383908	0.0389278	0.0405946	0.0141887	0.00289209	-0.0134032	-0.0192238	-0.028347	0.0408626	-0.0144778	0.025676	0.0106502	0.0147233	0.0662098
	4		340	364	312	337	276	275	306	337	329	338	375	387	380	300	209	261	233	300	604	617	613	208	281	301	218			4	-0.0408117	-0.00914959	-0.0295919	-0.0325757	-0.0408917	-0.0381503	-0.0156802	0.00355848	-0.0126834	0.0016091	0.0355832	0.026908	0.0186822	-0.0235954	-0.0672435	0.0109527	-0.0336136	0.0147233	-0.047623
		Total number of genes	1494	1487	1336	1453	1213	1201	1269	1337	1355	1347	1382	1455	1456	1267	976	1018	1007	1160	2696	2698	2695	820	992	1022	977
Cloud	1		100	151	92	131	90	68	118	116	112	80	70	68	68	92	234	253	265	235	13	17	14	305	99	132	116		Cloud	1	-0.0890215	0.0633664	-0.169751	0.00752406	-0.0679796	0.0229492	-0.0470437	-0.0478118	-0.0105347	0.126752	0.0669468	0.153536	0.153536	0.0647886	-0.0109954	-0.0237972	-0.122061	-0.146458	-0.192482
	2		153	115	173	184	142	48	170	167	122	46	80	43	43	94	258	307	364	411	15	16	16	284	79	91	110			2	0.0956699	-0.0549127	0.104507	0.155071	0.130066	-0.128318	0.111523	0.110447	0.0266071	-0.11358	0.124939	-0.0455049	-0.0455049	0.0741286	0.0314085	0.0602207	0.0157943	0.096316	-0.130334
	3		129	131	119	106	134	94	184	116	117	41	43	47	47	67	259	281	386	337	26	22	22	415	95	180	128			3	0.0215682	0.00166078	-0.0579919	-0.0844414	0.104883	0.163568	0.145892	-0.0478118	0.00843317	-0.163554	-0.144683	-0.00687552	-0.00687552	-0.0729245	0.0330885	0.0217886	0.0412802	0.0101041	0.108548
	4		109	125	160	94	55	48	54	119	108	72	47	33	33	64	209	228	389	334	27	25	28	298	109	92	127			4	-0.051595	-0.0187005	0.0705811	-0.136619	-0.281859	-0.128318	-0.386532	-0.0367228	-0.0263289	0.0809946	-0.106053	-0.160459	-0.160459	-0.0928193	-0.060065	-0.0689829	0.0446425	0.00622068	0.124939
		Total number of genes	491	522	544	515	421	258	526	518	459	239	240	191	191	317	960	1069	1404	1317	81	80	80	1302	382	495	481
6 sectors																													6 sectors
Pangene category	Sectors		P. fuliginea Bsw20308	P. sp. 1_2015MBL_MicDiv	P. aliena EH1	P. arctica A 37-1-2	P. translucida KMM 520	P. translucida TAC125	P. nigrifaciens KMM 661	P. agarivorans DSM 14585	P. espejiana DSM 9414 ATCC 29659	P. sp. SM9913	P. tetraodonis GFC	P. issachenkonii KMM 3549	P. issachenkonii KCTC 12958	P. sp. 13-15	P. phenolica KCTC 12086	P. sp. NC201	P. piscicida DE2-B	P. rubra SCSIO 6842	P. luteoviolacea S4054	P. luteoviolacea S4054249	P. luteoviolacea S40542	P. tunicata D2	P. spongiae UST010723-006	P. spongiae SAO4-4	P. piratica OCN003		Pangene category	Sectors	P. fuliginea Bsw20308	P. sp. 1_2015MBL_MicDiv	P. aliena EH1	P. arctica A 37-1-2	P. translucida KMM 520	P. translucida TAC125	P. nigrifaciens KMM 661	P. agarivorans DSM 14585	P. espejiana DSM 9414 ATCC 29659	P. sp. SM9913	P. tetraodonis GFC	P. issachenkonii KMM 3549	P. issachenkonii KCTC 12958	P. sp. 13-15	P. phenolica KCTC 12086	P. sp. NC201	P. piscicida DE2-B	P. rubra SCSIO 6842	P. luteoviolacea S4054
Core	1		256	177	245	196	223	216	274	207	203	244	249	228	227	204	243	229	263	276	249	249	249	220	178	198	206		Core	1	0.0747058	-0.0858966	0.0532871	-0.0422845	0.0137643	-0.000421825	0.0487932	-0.0175638	-0.0263738	0.0528492	0.0630012	0.0223901	0.0218205	-0.023904	0.0544297	0.0320492	0.0921695	0.106368	0.0613238
	2		198	276	243	248	233	232	277	242	227	189	169	207	197	223	183	181	227	197	316	316	316	216	216	215	183			2	-0.0368689	0.107039	0.0497273	0.0599111	0.0328153	0.0306124	0.0535224	0.0502812	0.022156	-0.0580788	-0.105311	-0.0195744	-0.0397391	0.0147707	-0.0687255	-0.0701077	0.0282396	-0.0400744	0.164812
	3		188	192	199	176	170	208	190	194	206	203	206	207	212	189	164	213	210	192	118	114	114	247	237	236	200			3	-0.0593763	-0.0505686	-0.0370259	-0.0890279	-0.104092	-0.0168122	-0.110204	-0.0457324	-0.0200027	-0.0270446	-0.0193309	-0.0195744	-0.00786951	-0.0570723	-0.116333	0.000593329	-0.00556698	-0.0512394	-0.262994
	4		174	190	204	183	195	188	166	208	181	218	209	209	207	200	199	219	170	181	109	112	112	146	249	202	212			4	-0.0929849	-0.0551163	-0.0262488	-0.0720895	-0.044506	-0.0607177	-0.168849	-0.0154708	-0.0761913	0.00391589	-0.0130518	-0.0153985	-0.018235	-0.0325041	-0.0323235	0.0126578	-0.0973374	-0.076862	-0.297449
	5		275	210	181	234	203	203	260	189	216	235	230	239	235	237	290	228	200	223	242	231	231	275	199	220	239			5	0.105799	-0.0116506	-0.0782004	0.0346753	-0.0270446	-0.0273795	0.026016	-0.0570723	0.000583875	0.0365273	0.0285297	0.0428532	0.0368625	0.0412142	0.131221	0.0301486	-0.0267563	0.0137643	0.0489398
	6		202	249	228	259	272	250	302	253	261	207	229	209	217	240	207	206	206	227	263	274	275	196	191	204	231			6	-0.0281828	0.0623295	0.0220559	0.0787592	0.100028	0.0630644	0.0910495	0.0695864	0.0827706	-0.0185703	0.0266374	-0.0153985	0.00225437	0.0466771	-0.0152062	-0.0139191	-0.0139191	0.0214853	0.0850802
		Total number of genes	1293	1294	1300	1296	1296	1297	1469	1293	1294	1296	1292	1299	1295	1293	1286	1276	1276	1296	1297	1296	1297	1300	1270	1275	1271
Softcore	1		288	226	291	251	267	258	274	239	235	273	280	257	256	260	271	264	297	322	295	295	295	245	218	240	230		Softcore	1	0.0763885	-0.0351445	0.072283	0.00953537	0.0363729	0.0226623	0.0487932	-0.00848507	-0.0181851	0.0451407	0.0558419	0.0183231	0.0183966	0.0257204	0.0520684	0.0380009	0.099451	0.12127	0.0773314
	2		218	304	263	272	258	257	277	268	270	224	211	227	216	246	201	208	241	217	352	352	352	237	243	240	226			2	-0.0445475	0.0936206	0.0283457	0.0444306	0.0214814	0.0209757	0.0535224	0.0412518	0.0421108	-0.0407739	-0.0670336	-0.0355842	-0.0553897	0.00168217	-0.0777048	-0.0655397	0.00871159	-0.0501261	0.154052
	3		214	213	224	199	193	231	190	219	225	227	227	231	237	215	183	241	234	215	136	130	130	238	262	264	232			3	-0.0525902	-0.0608733	-0.041362	-0.0912853	-0.104581	-0.0253454	-0.110204	-0.0464389	-0.0370704	-0.0349961	-0.0352902	-0.0279981	-0.0150951	-0.0568145	-0.11845	-0.00158597	-0.00408959	-0.0541474	-0.258952
	4		194	217	229	204	220	211	166	230	207	247	241	237	235	223	219	241	183	198	134	136	137	279	272	221	228			4	-0.0952023	-0.0527932	-0.0317746	-0.0805082	-0.0477157	-0.0646749	-0.168849	-0.0251551	-0.0732826	0.001675	-0.00929905	-0.0168617	-0.0187755	-0.0409481	-0.0404567	-0.00158597	-0.110854	-0.0899206	-0.265386
	5		305	233	204	258	221	220	260	209	240	265	260	269	264	257	314	247	221	243	266	256	256	295	222	243	269			5	0.101296	-0.021897	-0.0819799	0.0214814	-0.0457461	-0.0465347	0.026016	-0.0667367	-0.00904169	0.0322239	0.0236573	0.0381422	0.0317605	0.0206802	0.116029	0.00909394	-0.0289132	-0.000979542	0.032391
	6		230	277	267	289	314	292	302	297	293	240	258	257	264	269	254	250	241	266	298	311	311	245	215	229	250			6	-0.0212761	0.0532268	0.0349012	0.0707595	0.106791	0.0764255	0.0910495	0.0858735	0.0776147	-0.0108107	0.0203036	0.0183231	0.0317605	0.0404993	0.0239329	0.014337	0.00871159	0.0382958	0.0817256
		Total number of genes	1449	1470	1478	1473	1473	1469	1469	1462	1470	1476	1477	1478	1472	1470	1442	1451	1417	1461	1481	1480	1481	1539	1432	1437	1435
Shell	1		246	216	204	230	181	169	194	218	223	189	211	213	213	192	146	167	172	178	392	392	394	142	168	169	157		Shell	1	-0.00535109	-0.0597928	-0.0381119	-0.0224734	-0.0481178	-0.0735919	-0.0375955	-0.00961051	-0.00557003	-0.0748414	-0.0381612	-0.056419	-0.0567174	-0.041411	-0.0470326	-0.00696691	0.0105634	-0.0359736	-0.0593694
	2		251	208	188	217	217	217	225	200	226	243	233	262	255	202	186	162	183	191	339	338	340	151	168	194	212			2	0.00338752	-0.0761832	-0.0735842	-0.0477415	0.0306633	0.0349811	0.0267853	-0.047037	0.000233544	0.0343031	0.00491228	0.0335027	0.0214432	-0.0193608	0.0581275	-0.0201684	0.037486	-0.00536022	-0.122456
	3		249	287	210	236	194	212	197	228	227	238	228	245	252	238	199	158	154	191	576	563	559	125	163	166	157			3	-8.68502e-05	0.0636353	-0.0255228	-0.0112892	-0.0179947	0.0248573	-0.030931	0.00986784	0.00215096	0.0252738	-0.0045088	0.00436749	0.0163036	0.0518647	0.0874677	-0.0310263	-0.0374443	-0.00536022	0.107767
	4		289	273	259	287	205	219	216	235	260	244	237	247	247	234	177	165	184	206	547	544	546	153	149	127	154			4	0.0646116	0.0419161	0.0655577	0.0736807	0.00595746	0.0389655	0.00905653	0.0230009	0.0610985	0.0360866	0.0123047	0.00789836	0.00759998	0.0445036	0.0365878	-0.0121994	0.0398528	0.0274736	0.0853318
	5		203	259	287	250	232	215	241	244	223	211	236	239	239	196	113	185	153	201	444	453	451	96	147	160	146			5	-0.0887902	0.0190532	0.11014	0.0137388	0.0596916	0.0309599	0.0566198	0.0393228	-0.00557003	-0.0270207	0.0104684	-0.00640069	-0.00669907	-0.0324561	-0.158307	0.0374884	-0.0402736	0.0168025	-0.00527252
	6		256	244	188	233	184	169	196	212	196	222	237	249	250	205	155	181	161	193	398	408	405	153	197	206	151			6	0.0119538	-0.00685674	-0.0735842	-0.0168453	-0.0409786	-0.0735919	-0.0331412	-0.0217311	-0.0616188	-0.00495022	0.0123047	0.0114008	0.012843	-0.0129584	-0.0210537	0.0279952	-0.0181392	-0.00083628	-0.0527724
		Total number of genes	1494	1487	1336	1453	1213	1201	1269	1337	1355	1347	1382	1455	1456	1267	976	1018	1007	1160	2696	2698	2695	820	992	1022	977
Cloud	1		46	118	61	99	72	53	94	83	82	38	29	51	51	48	141	149	171	160	11	13	11	221	74	91	93		Cloud	1	-0.250259	0.132276	-0.172205	0.0618924	0.0111148	0.0907206	0.0302065	-0.0171873	0.0300656	-0.0205499	-0.139749	0.204601	0.204601	-0.0417536	-0.0549877	-0.077727	-0.136307	-0.137401	-0.0890279
	2		91	68	112	71	25	26	39	92	44	53	56	29	29	72	173	230	216	252	6	10	8	192	49	64	42			2	0.0460243	-0.107097	0.0916835	-0.0824845	-0.448278	-0.218582	-0.351857	0.0275225	-0.240296	0.123942	0.146041	-0.040571	-0.040571	0.134338	0.0338393	0.110815	-0.034849	0.0598792	-0.352269
	3		117	80	92	145	133	37	155	113	108	35	65	31	31	66	178	181	232	234	11	7	11	176	55	69	91			3	0.155169	-0.0365161	0.00625333	0.227625	0.277634	-0.0653536	0.24741	0.116813	0.149675	-0.0562655	0.210767	-0.0116073	-0.0116073	0.0965491	0.0462132	0.00676527	-0.00381472	0.0276945	-0.0890279
	4		77	90	80	69	95	70	155	95	73	29	22	38	38	38	184	174	273	256	19	20	17	287	59	135	98			4	-0.0265264	0.0146364	-0.0544445	-0.0948937	0.131506	0.211543	0.24741	0.0414582	-0.0204254	-0.137936	-0.259724	0.0768146	0.0768146	-0.143211	0.060611	-0.0103641	0.0668599	0.0667186	0.148333
	5		68	88	83	72	67	45	41	87	97	24	24	17	17	52	133	168	266	196	13	11	13	209	91	64	65			5	-0.0805082	0.00487657	-0.0384564	-0.0764103	-0.0201429	0.0196572	-0.330137	0.00325389	0.103023	-0.220122	-0.221936	-0.27252	-0.27252	-0.00699152	-0.0803552	-0.025604	0.0555789	-0.0492653	-0.0164773
	6		92	78	116	59	29	27	42	48	55	60	44	25	25	41	151	167	246	219	21	19	20	217	54	72	92			6	0.0507707	-0.0475115	0.106923	-0.162891	-0.38382	-0.202192	-0.319672	-0.255024	-0.143386	0.177818	0.0413058	-0.105029	-0.105029	-0.110211	-0.0252299	-0.0281968	0.0216324	-0.00107726	0.191799
		Total number of genes	491	522	544	515	421	258	526	518	459	239	240	191	191	317	960	1069	1404	1317	81	80	80	1302	382	495	481
8 sectors																													8 sectors
Pangene category	Sectors		P. fuliginea Bsw20308	P. sp. 1_2015MBL_MicDiv	P. aliena EH1	P. arctica A 37-1-2	P. translucida KMM 520	P. translucida TAC125	P. nigrifaciens KMM 661	P. agarivorans DSM 14585	P. espejiana DSM 9414 ATCC 29659	P. sp. SM9913	P. tetraodonis GFC	P. issachenkonii KMM 3549	P. issachenkonii KCTC 12958	P. sp. 13-15	P. phenolica KCTC 12086	P. sp. NC201	P. piscicida DE2-B	P. rubra SCSIO 6842	P. luteoviolacea S4054	P. luteoviolacea S4054249	P. luteoviolacea S40542	P. tunicata D2	P. spongiae UST010723-006	P. spongiae SAO4-4	P. piratica OCN003		Pangene category	Sectors	P. fuliginea Bsw20308	P. sp. 1_2015MBL_MicDiv	P. aliena EH1	P. arctica A 37-1-2	P. translucida KMM 520	P. translucida TAC125	P. nigrifaciens KMM 661	P. agarivorans DSM 14585	P. espejiana DSM 9414 ATCC 29659	P. sp. SM9913	P. tetraodonis GFC	P. issachenkonii KMM 3549	P. issachenkonii KCTC 12958	P. sp. 13-15	P. phenolica KCTC 12086	P. sp. NC201	P. piscicida DE2-B	P. rubra SCSIO 6842	P. luteoviolacea S4054
Core	1		172	149	168	160	188	175	183	170	170	180	185	166	165	163	192	188	184	213	225	225	225	160	143	133	147		Core	1	0.0270199	-0.035658	0.0144559	-0.00539503	0.0646428	0.0331881	0.0505967	0.0219404	0.0216046	0.0457575	0.0589992	0.00958892	0.00830416	0.00367907	0.0771502	0.0713972	0.0620571	0.118865	0.142333
	2		188	158	215	141	146	155	161	161	146	152	135	172	173	141	122	161	177	215	203	195	196	190	152	159	150			2	0.0656493	-0.0101872	0.121585	-0.0602959	-0.0451622	-0.0195183	-0.00502855	-0.00168266	-0.0444914	-0.0276714	-0.0778388	0.0250093	0.0288663	-0.0592894	-0.119791	0.00406519	0.0452126	0.122923	0.097646
	3		151	206	168	217	172	168	185	166	172	159	160	153	152	162	118	126	183	105	148	156	155	163	159	178	127			3	-0.0295316	0.105023	0.0144559	0.126945	0.0260134	0.0154593	0.0553173	0.0115996	0.0266842	-0.00811789	-0.00405254	-0.0258277	-0.0273362	0.00100648	-0.134269	-0.10239	0.0596904	-0.188326	-0.0395883
	4		131	137	136	102	129	158	126	144	143	145	144	151	151	150	158	148	156	132	108	107	107	195	177	168	165			4	-0.0912372	-0.0721237	-0.0773145	-0.200915	-0.0989253	-0.0111929	-0.111484	-0.050146	-0.0535083	-0.048147	-0.04981	-0.0315422	-0.0302028	-0.0324173	-0.00749389	-0.032499	-0.00963609	-0.0889411	-0.176426
	5		116	124	149	133	125	131	104	151	126	162	162	157	157	150	196	148	153	143	105	106	106	57	172	155	148			5	-0.144051	-0.115423	-0.0376671	-0.0856634	-0.112605	-0.0925787	-0.194821	-0.0295316	-0.108474	0	0.00134249	-0.0146195	-0.0132801	-0.0324173	0.0861051	-0.032499	-0.0180693	-0.054179	-0.188661
	6		179	158	141	158	148	152	153	160	192	183	182	183	184	171	139	153	134	172	127	121	122	195	191	181	180			6	0.0443445	-0.0101872	-0.0616343	-0.0108579	-0.0392533	-0.0280064	-0.027163	-0.00438856	0.0744569	0.0529361	0.0518989	0.0519319	0.055638	0.0244876	-0.0631362	-0.0180693	-0.0756559	0.0260134	-0.106046
	7		192	210	160	198	189	184	222	175	162	154	141	156	140	209	208	211	158	146	201	195	196	220	134	163	182			7	0.0747927	0.113375	-0.00673338	0.0871502	0.0669468	0.0549678	0.134499	0.0345295	0.000670725	-0.0219943	-0.0589534	-0.0173946	-0.0630517	0.111638	0.111912	0.121522	-0.0041036	-0.0451622	0.0933461
	8		164	152	163	187	199	174	169	166	183	161	183	161	173	147	153	141	131	170	180	191	190	120	142	138	172			8	0.00633531	-0.0270007	0.00133424	0.0623266	0.0893381	0.0306993	0.0160323	0.0115996	0.0536068	-0.00268914	0.0542786	-0.00369329	0.0288663	-0.0411912	-0.0214596	-0.0535416	-0.0854894	0.0209339	0.0454225
		Total number of genes	1293	1294	1300	1296	1296	1297	1303	1293	1294	1296	1292	1299	1295	1293	1286	1276	1276	1296	1297	1296	1297	1300	1270	1275	1271
Softcore	1		188	196	203	206	224	210	217	193	193	205	213	185	184	210	215	219	213	250	260	260	260	174	173	163	169		Softcore	1	0.0161795	0.0280287	0.0409116	0.0487545	0.0851353	0.0582875	0.0725279	0.0236999	0.02133	0.0457575	0.0620891	0.000587281	0	0.0579919	0.0759613	0.0818667	0.0800997	0.13638	0.147508
	2		216	178	242	160	172	179	188	188	185	181	172	192	193	161	136	181	189	236	237	228	237	207	175	184	169			2	0.0764754	-0.0138073	0.117231	-0.0609928	-0.0295843	-0.0110788	0.010226	0.0123005	0.00294438	-0.0083178	-0.0307621	0.0167168	0.0207395	-0.0574015	-0.122938	-0.000898851	0.0281819	0.111352	0.107283
	3		165	222	178	237	185	182	188	178	189	173	173	168	167	178	133	142	195	114	165	174	165	176	175	194	155			3	-0.0404945	0.0821256	-0.0161644	0.109636	0.00205897	-0.00386042	0.010226	-0.0114374	0.0122345	-0.0279503	-0.0282444	-0.0412752	-0.0421014	-0.0138073	-0.132626	-0.106289	0.0417547	-0.204655	-0.0499811
	4		151	153	155	119	146	175	148	165	157	165	160	170	170	172	173	171	175	154	122	120	122	223	200	190	195			4	-0.0790015	-0.0795359	-0.0762527	-0.189566	-0.10076	-0.0208938	-0.0936701	-0.0443734	-0.0683277	-0.0485124	-0.0621705	-0.0361355	-0.0343689	-0.0286989	-0.0184311	-0.0255813	-0.00524181	-0.0740395	-0.181105
	5		131	144	169	150	144	148	113	169	148	184	187	179	179	169	214	164	166	155	122	123	122	64	193	173	157			5	-0.140707	-0.105865	-0.0386977	-0.0890215	-0.10675	-0.0936701	-0.210853	-0.0339707	-0.0939656	-0.00117855	0.0055511	-0.0137314	-0.0119648	-0.0363406	0.0739366	-0.0437336	-0.0281718	-0.0712285	-0.181105
	6		192	173	156	171	159	164	174	175	204	202	200	200	201	184	151	165	145	188	146	139	148	206	200	191	202			6	0.0253228	-0.0261812	-0.0734598	-0.0321166	-0.0637156	-0.049088	-0.0233826	-0.0188193	0.0454028	0.039355	0.0347395	0.0344455	0.0383782	0.000590475	-0.0775003	-0.0410935	-0.0869119	0.0125976	-0.103112
	7		216	235	182	223	211	206	236	189	185	177	165	180	164	231	239	238	181	176	221	215	220	244	157	188	201			7	0.0764754	0.106841	-0.00651306	0.0831921	0.0591697	0.0499354	0.10898	0.0146044	0.00294438	-0.0180231	-0.0488066	-0.0113119	-0.049974	0.0993846	0.121921	0.118	0.00939871	-0.0160476	0.0769272
	8		190	169	193	207	232	205	205	205	209	189	207	204	214	165	183	171	153	188	208	221	207	160	159	154	187			8	0.0207752	-0.0363406	0.0189729	0.0508576	0.100375	0.0478221	0.0478221	0.0498965	0.0559189	0.0104654	0.0496798	0.0430457	0.065596	-0.0467434	0.00597388	-0.0255813	-0.0635884	0.0125976	0.0505983
		Total number of genes	1449	1470	1478	1473	1473	1469	1469	1462	1470	1476	1477	1478	1472	1470	1444	1451	1417	1461	1481	1480	1481	1454	1432	1437	1435
Shell	1		195	157	168	173	139	133	147	166	166	159	162	161	161	145	108	123	134	126	266	269	271	117	132	130	106		Shell	1	0.018774	-0.0733213	0.00259281	-0.0211295	-0.037756	-0.0526014	-0.0330543	-0.00293333	-0.00874122	-0.0248805	-0.027903	-0.0529471	-0.0532455	-0.0383186	-0.0529361	-0.0147527	0.0271653	-0.0609975	-0.102748
	2		161	178	139	190	155	148	151	157	164	135	143	174	174	152	147	104	146	133	305	286	286	106	121	150	160			2	-0.0644347	-0.018801	-0.0797017	0.019578	0.00956088	-0.00619131	-0.0213947	-0.0271418	-0.0140055	-0.0959438	-0.082082	-0.0192238	-0.0195221	-0.017843	0.0809575	-0.0876245	0.0644134	-0.0375164	-0.0433301
	3		194	156	121	132	159	158	179	156	175	190	186	199	199	169	139	138	117	144	341	337	339	102	131	133	139			3	0.0165411	-0.0760964	-0.139931	-0.138602	0.0206263	0.0222041	0.0524814	-0.0299168	0.0141887	0.052476	0.0320949	0.0390801	0.0387817	0.0282001	0.056655	0.0352213	-0.0317536	-0.00300551	0.00512448
	4		196	234	174	188	148	159	139	154	158	186	181	186	201	166	137	122	112	157	411	413	411	101	115	112	121			4	0.0209955	0.0999949	0.0178328	0.0149822	-0.0105091	0.0249441	-0.0573568	-0.0355207	-0.0301922	0.0432353	0.0202605	0.00973994	0.0431247	0.0204215	0.0503607	-0.018298	-0.0507215	0.0345317	0.0862119
	5		245	211	208	233	151	169	174	186	211	184	180	170	172	185	116	142	144	135	390	387	389	125	105	87	113			5	0.117905	0.0550615	0.0953469	0.10818	-0.00179387	0.0514337	0.0401776	0.0464715	0.0954331	0.0385402	0.0178544	-0.0293241	-0.0245429	0.0674851	-0.0219018	0.0476306	0.058423	-0.0310342	0.0634347
	6		163	195	214	200	173	164	163	187	143	150	150	175	161	155	120	128	113	165	379	389	386	63	107	109	120			6	-0.059073	0.0208136	0.107697	0.0418544	0.0572753	0.0383908	0.011816	0.0488002	-0.0735133	-0.0501863	-0.0613268	-0.016735	-0.0532455	-0.00935493	-0.00717858	0.00255218	-0.046861	0.0561159	0.0510093
	7		175	158	150	165	139	130	157	153	171	182	207	204	201	121	89	117	124	151	289	296	293	91	109	137	100			7	-0.0282226	-0.0705639	-0.0466252	-0.0416917	-0.037756	-0.0625097	-0.00447198	-0.03835	0.0041468	0.0337938	0.0785523	0.0498572	0.0431247	-0.116901	-0.13697	-0.0364719	-0.0065178	0.0176089	-0.0667321
	8		165	198	162	172	149	140	159	178	167	161	173	186	187	174	120	144	117	149	315	321	320	115	172	164	118			8	-0.0537767	0.0274442	-0.0132015	-0.0236472	-0.00758455	-0.030325	0.00102549	0.0273786	-0.00613284	-0.0194517	0.000628047	0.00973994	0.0117702	0.0408626	-0.00717858	0.0537047	-0.0317536	0.0118183	-0.0293193
		Total number of genes	1494	1487	1336	1453	1213	1201	1269	1337	1355	1347	1382	1455	1456	1267	976	1018	1007	1160	2696	2698	2695	820	992	1022	977
Cloud	1		37	67	50	41	17	17	58	41	41	16	5	35	35	25	97	98	113	104	9	11	9	169	35	72	85		Cloud	1	-0.21979	0.0114943	-0.133539	-0.195933	-0.490743	-0.278081	-0.0544678	-0.198456	-0.145939	-0.271188	-0.778151	0.166125	0.166125	-0.200029	-0.0924095	-0.134662	-0.191199	-0.199462	-0.0511525
	2		63	84	42	90	73	53	60	75	71	64	65	33	33	67	137	155	145	131	5	6	5	147	64	60	31			2	0.011349	0.109699	-0.20926	0.145525	0.142131	0.215746	-0.0397445	0.0638215	0.0925357	0.330872	0.335792	0.140571	0.140571	0.228106	0.0575393	0.064444	-0.0829091	-0.0992245	-0.306425
	3		55	62	97	51	36	20	33	86	36	17	21	14	14	51	148	160	168	222	7	9	8	163	34	32	66			3	-0.0476288	-0.0221888	0.154263	-0.101147	-0.16489	-0.2075	-0.299382	0.123259	-0.20242	-0.244859	-0.154902	-0.231815	-0.231815	0.109601	0.0910805	0.0782323	-0.0189678	0.129857	-0.160297
	4		98	53	76	133	106	26	137	81	85	29	59	29	29	43	110	147	193	189	7	7	8	116	45	59	44			4	0.203235	-0.0903046	0.0483047	0.315134	0.304114	-0.0935564	0.318825	0.0972452	0.170696	-0.0129099	0.293731	0.0844546	0.0844546	0.0354992	-0.0377886	0.0414296	0.0412802	0.059966	-0.160297
	5		65	65	62	57	85	63	114	65	61	12	13	28	29	24	110	134	170	190	9	10	8	251	42	99	90			5	0.0249219	-0.00166716	-0.0401172	-0.0528424	0.208227	0.290811	0.239009	0.00167358	0.0266071	-0.396127	-0.363178	0.0692147	0.0844546	-0.217758	-0.0377886	0.00121708	-0.0138282	0.0622578	-0.0511525
	6		64	72	57	49	48	32	63	58	53	28	30	19	18	43	149	147	222	147	17	12	14	171	53	81	38			6	0.0181885	0.042752	-0.0766341	-0.118521	-0.0399509	-0.00337974	-0.0185552	-0.0478118	-0.0344468	-0.0281499	0	-0.0991898	-0.122671	0.0354992	0.094005	0.0414296	0.102076	-0.0491785	0.225054
	7		39	47	81	52	30	24	23	78	64	21	8	15	15	27	92	85	175	153	12	9	11	105	74	56	59			7	-0.196927	-0.142483	0.0759761	-0.0927139	-0.244071	-0.128318	-0.456168	0.0808548	0.0474573	-0.153089	-0.574031	-0.201852	-0.201852	-0.166606	-0.115393	-0.196469	-0.00123907	-0.0318044	0.0737862
	8		70	72	79	42	26	23	38	34	48	52	39	18	18	37	117	143	218	181	15	16	17	180	35	36	68			8	0.0571065	0.042752	0.0651182	-0.185468	-0.306219	-0.146802	-0.238112	-0.279761	-0.0774815	0.240695	0.113943	-0.122671	-0.122671	-0.0297676	-0.0109954	0.0294483	0.0941794	0.0411828	0.170696
		Total number of genes	491	522	544	515	421	258	526	518	459	239	240	191	191	317	960	1069	1404	1317	81	80	80	1302	382	495	481
10 sectors																													10 sectors
Pangene category	Sectors		P. fuliginea Bsw20308	P. sp. 1_2015MBL_MicDiv	P. aliena EH1	P. arctica A 37-1-2	P. translucida KMM 520	P. translucida TAC125	P. nigrifaciens KMM 661	P. agarivorans DSM 14585	P. espejiana DSM 9414 ATCC 29659	P. sp. SM9913	P. tetraodonis GFC	P. issachenkonii KMM 3549	P. issachenkonii KCTC 12958	P. sp. 13-15	P. phenolica KCTC 12086	P. sp. NC201	P. piscicida DE2-B	P. rubra SCSIO 6842	P. luteoviolacea S4054	P. luteoviolacea S4054249	P. luteoviolacea S40542	P. tunicata D2	P. spongiae UST010723-006	P. spongiae SAO4-4	P. piratica OCN003		Pangene category	Sectors	P. fuliginea Bsw20308	P. sp. 1_2015MBL_MicDiv	P. aliena EH1	P. arctica A 37-1-2	P. translucida KMM 520	P. translucida TAC125	P. nigrifaciens KMM 661	P. agarivorans DSM 14585	P. espejiana DSM 9414 ATCC 29659	P. sp. SM9913	P. tetraodonis GFC	P. issachenkonii KMM 3549	P. issachenkonii KCTC 12958	P. sp. 13-15	P. phenolica KCTC 12086	P. sp. NC201	P. piscicida DE2-B	P. rubra SCSIO 6842	P. luteoviolacea S4054
Core	1		127	117	123	124	142	130	142	135	136	149	145	137	137	115	162	164	146	171	187	187	187	137	119	116	100		Core	1	-0.0077948	-0.0437484	-0.0240382	-0.0191833	0.0396833	0.00100338	0.0373439	0.0187352	0.0216046	0.0605813	0.0501055	0.0231114	0.0244508	-0.0509007	0.100274	0.108993	0.0585022	0.120391	0.158902
	2		175	93	187	129	120	131	122	132	125	135	131	120	119	134	113	130	174	174	116	115	116	136	109	114	134			2	0.13144	-0.143451	0.157898	-0.00201529	-0.0334238	0.00433132	-0.0285846	0.00897541	-0.0150243	0.0177288	0.00600878	-0.0344279	-0.0367228	0.0155063	-0.0561625	0.00809268	0.134699	0.127944	-0.048482
	3		106	205	155	135	137	131	144	123	121	107	110	130	130	124	114	81	134	102	202	203	202	127	130	131	120			3	-0.0862927	0.19982	0.0763883	0.0177288	0.0241156	0.00433132	0.0434181	-0.0216934	-0.0291489	-0.0832212	-0.0698698	0.000334201	0.00167358	-0.0181768	-0.0523361	-0.197366	0.0212541	-0.104005	0.192411
	4		149	134	118	148	132	136	127	151	137	141	116	143	144	133	69	141	119	112	77	77	77	147	143	139	102			4	0.0615877	0.0151705	-0.0420613	0.0576567	0.00796893	0.0205989	-0.0111407	0.0673784	0.0247863	0.0366141	-0.0468045	0.0417269	0.0460927	0.0122531	-0.270392	0.0433684	-0.0303037	-0.063387	-0.226449
	5		85	101	114	84	95	128	97	102	117	105	107	112	106	114	132	107	127	106	102	101	101	161	130	138	132			5	-0.18218	-0.107613	-0.0570385	-0.188326	-0.134881	-0.00573001	-0.128173	-0.102998	-0.0437484	-0.0914157	-0.0818787	-0.0643911	-0.0869639	-0.0546937	0.011333	-0.0764669	-0.00204695	-0.0872991	-0.10434
	6		98	87	112	100	114	90	113	121	100	148	139	142	138	116	152	139	134	113	101	101	101	48	149	122	116			6	-0.120372	-0.172415	-0.0647253	-0.112605	-0.0557002	-0.158697	-0.061866	-0.0288132	-0.111934	0.0576567	0.0317523	0.0386792	0.0276093	-0.0471405	0.0726026	0.0371641	0.0212541	-0.0595266	-0.108619
	7		109	139	122	139	122	146	97	134	155	136	143	129	129	149	90	123	45	128	60	52	53	120	123	27	114			7	-0.074172	0.0310805	-0.0275835	0.0304098	-0.0262452	0.0514129	-0.128173	0.0155063	0.0783974	0.0209339	0.0440735	-0.00301944	-0.00168006	0.0615877	-0.154998	-0.0159456	-0.452638	-0.00539503	-0.334789
	8		192	106	96	142	142	115	153	118	126	128	149	136	144	129	166	120	141	127	132	141	140	161	155	161	178			8	0.171703	-0.0866284	-0.131672	0.0396833	0.0396833	-0.0522421	0.069747	-0.0397165	-0.0115637	-0.00539503	0.0619238	0.0199298	0.0460927	-0.00100881	0.110867	-0.0266694	0.0433684	-0.00880128	0.00763396
	9		103	184	151	161	151	150	167	157	156	138	121	128	119	165	183	164	152	129	181	172	174	172	110	118	143			9	-0.0987613	0.152884	0.0650336	0.0942209	0.0663719	0.0631513	0.107772	0.0843011	0.0811903	0.0272741	-0.0284771	-0.00639918	-0.0367228	0.105885	0.15321	0.108993	0.0759929	-0.00201529	0.144739
	10		149	128	122	134	141	140	141	120	121	109	131	122	129	114	105	107	104	134	139	147	146	92	102	109	132			10	0.0615877	-0.00472431	-0.0275835	0.0144998	0.0366141	0.0331881	0.0342747	-0.0324173	-0.0291489	-0.0751785	0.00600878	-0.0272493	-0.00168006	-0.0546937	-0.0880517	-0.0764669	-0.0888173	0.0144998	0.0300748
		Total number of genes	1293	1294	1300	1296	1296	1297	1303	1293	1294	1296	1292	1299	1295	1293	1286	1276	1276	1296	1297	1296	1297	1301	1270	1175	1271
Softcore	1		140	162	154	167	176	161	173	155	156	168	165	155	155	157	179	186	166	207	211	211	212	151	145	145	120		Softcore	1	-0.0149403	0.0421977	0.0178463	0.0545137	0.0773099	0.0398041	0.0710243	0.0253843	0.0258073	0.0562229	0.0481034	0.0206573	0.0224239	0.0285823	0.0932858	0.107846	0.0687382	0.15132	0.162615
	2		199	100	208	145	136	148	139	155	145	151	145	134	133	151	130	153	192	189	148	147	147	145	130	135	146			2	0.137785	-0.167317	0.148389	-0.00683474	-0.0346638	0.00323992	-0.024007	0.0253843	-0.00594933	0.00989059	-0.00801249	-0.0425696	-0.0440562	0.0116596	-0.0456238	0.023024	0.131931	0.111812	0.0085943
	3		118	227	168	152	153	146	161	136	151	133	146	143	143	141	126	90	142	113	227	228	227	138	148	146	133			3	-0.0891864	0.188709	0.0556348	0.0136408	0.0164887	-0.00266894	0.0398041	-0.0314085	0.0116596	-0.0452347	-0.00502764	-0.0143384	-0.0125718	-0.0180982	-0.0591966	-0.207425	0.000918494	-0.111572	0.194358
	4		163	148	128	161	143	148	138	160	149	154	125	156	157	144	76	157	133	120	84	84	84	160	152	151	135			4	0.0511192	0.00294438	-0.0624645	0.0386231	-0.0128667	0.00323992	-0.0271427	0.0391726	0.00586893	0.0184344	-0.0724705	0.0234502	0.0279918	-0.00895484	-0.278754	0.0342322	-0.0275182	-0.085469	-0.237388
	5		100	112	130	97	110	143	109	120	129	119	122	127	121	134	146	127	139	125	114	112	114	186	148	154	153			5	-0.161068	-0.118099	-0.0557311	-0.181431	-0.12681	-0.0116858	-0.129595	-0.0857661	-0.0567276	-0.0935394	-0.0830207	-0.0658707	-0.0851224	-0.0402125	0.00478566	-0.0578637	-0.00835505	-0.0677402	-0.104763
	6		109	102	127	112	130	104	128	136	117	169	161	163	158	130	166	155	145	122	117	117	117	53	167	138	123			6	-0.123642	-0.158717	-0.0658707	-0.118985	-0.0542594	-0.149988	-0.0598118	-0.0314085	-0.0991315	0.0588003	0.0374454	0.0425132	0.0307493	-0.053374	0.0605409	0.0286643	0.00999815	-0.0782904	-0.0934816
	7		122	153	138	153	134	157	97	146	168	148	155	140	140	161	97	132	50	141	75	65	65	129	130	133	127			7	-0.0747086	0.0173741	-0.0297953	0.0164887	-0.0410979	0.0288779	-0.18025	-0.000594517	0.0579919	0.00117536	0.0209512	-0.0235464	-0.0217798	0.0395085	-0.172795	-0.0410935	-0.4524	-0.0154311	-0.286606
	8		210	118	109	155	153	126	158	129	140	146	168	153	162	142	183	132	153	139	114	155	154		170	179	200			8	0.161151	-0.0954353	-0.132248	0.022129	0.0164887	-0.0666513	0.0316353	-0.0543577	-0.0211893	-0.0047335	0.0559288	0.015017	0.0416072	-0.015029	0.102884	-0.0410935	0.0333216	-0.0216354	-0.104763
	9		115	206	168	181	170	169	198	170	172	155	139	147	135	181	209	185	180	156	198	189	191	202	124	131	153			9	-0.100371	0.14655	0.0556348	0.0894758	0.0622462	0.0608649	0.129643	0.0655015	0.0682111	0.0212453	-0.0263657	-0.0023571	-0.037574	0.0903612	0.160579	0.105504	0.103903	0.0284744	0.134998
	10		173	142	148	150	168	167	168	155	143	133	151	160	168	129	132	134	117	149	163	172	170	116	118	125	145			10	0.0769777	-0.015029	0.000587281	0.00788851	0.0571065	0.0556947	0.0582875	0.0253843	-0.0119813	-0.0452347	0.00959645	0.0344455	0.0574015	-0.0567276	-0.0389933	-0.0345626	-0.083184	0.00853605	0.0505202
		Total number of genes	1449	1470	1478	1473	1473	1469	1469	1462	1470	1476	1477	1478	1472	1470	1444	1451	1417	1461	1451	1480	1481	1280	1432	1437	1435
Shell	1		169	138	144	137	115	106	126	136	134	139	131	132	132	124	83	107	114	99	204	202	202	101	106	114	81		Shell	1	0.0535361	-0.0324319	0.032556	-0.025545	-0.023163	-0.0542371	-0.00309108	0.0074075	-0.0048345	0.0136472	-0.0232367	-0.0422891	-0.0425874	-0.00935493	-0.0703717	0.021636	0.0538754	-0.0688228	-0.12109
	2		106	148	108	127	113	107	106	123	133	102	115	124	138	113	103	90	96	103	288	286	288	79	100	104	112			2	-0.149045	-0.00204925	-0.0923827	-0.0584619	-0.0307824	-0.0501592	-0.0781558	-0.0362263	-0.00808765	-0.120767	-0.0798102	-0.0694413	-0.0232823	-0.0496982	0.0233874	-0.0535053	-0.0207582	-0.0516208	0.0286726
	3		168	99	114	151	136	119	136	130	141	163	122	140	145	122	103	100	106	123	183	187	189	89	96	108	123			3	0.0509587	-0.176676	-0.0689016	0.0167113	0.0496781	-0.00399605	0.0300773	-0.0121881	0.0172798	0.08282	-0.0541482	-0.016735	-0.00179337	-0.0164168	0.0233874	-0.00774778	0.0222764	0.0254471	-0.168269
	4		140	136	88	137	108	129	121	114	125	128	149	165	153	135	127	103	106	111	327	328	327	73	102	107	105			4	-0.0282226	-0.0387721	-0.181324	-0.025545	-0.050437	0.0310467	-0.0206763	-0.0692266	-0.0350293	-0.0221576	0.0326782	0.054621	0.0215301	0.0275572	0.114354	0.00508945	0.0222764	-0.019135	0.0838279
	5		163	204	158	131	120	137	113	143	143	155	155	159	152	152	115	99	87	124	321	302	301	84	95	92	101			5	0.037837	0.137319	0.0728506	-0.0449943	-0.00467955	0.0571776	-0.0503832	0.0292046	0.0233967	0.0609641	0.0498237	0.0385341	0.0186822	0.079067	0.071248	-0.0121126	-0.0635102	0.0289637	0.0757851
	6		194	182	155	181	116	133	136	152	154	144	146	145	145	149	88	106	118	103	298	294	297	103	84	67	100			6	0.113451	0.0877604	0.0645252	0.095413	-0.0194028	0.0443086	0.0300773	0.0557122	0.0555814	0.0289949	0.0238448	-0.00149499	-0.00179337	0.0704097	-0.0449671	0.0175581	0.0688525	-0.0516208	0.0434964
	7		163	127	150	161	128	99	117	125	136	125	121	136	136	104	105	83	111	133	351	366	361	56	95	90	93			7	0.037837	-0.0685072	0.0502848	0.0445603	0.0233492	-0.0839078	-0.0352758	-0.0292214	0.00159961	-0.0324576	-0.0577227	-0.0293241	-0.0296225	-0.0857433	0.0317395	-0.0886697	0.0422935	0.0593937	0.114587
	8		104	169	179	148	138	151	149	132	132	139	139	145	145	128	77	121	79	133	265	257	257	65	85	97	82			8	-0.157317	0.0555757	0.127047	0.0079961	0.0560183	0.0994339	0.0697246	-0.00555748	-0.0113654	0.0136472	0.00250676	-0.00149499	-0.00179337	0.00443335	-0.102959	0.0750376	-0.105402	0.0593937	-0.00747401
	9		147	109	98	123	103	100	120	128	116	132	151	146	146	105	74	90	99	115	214	225	222	71	92	107	74			9	-0.00703326	-0.134884	-0.13458	-0.0723605	-0.0710236	-0.079543	-0.0242804	-0.0189214	-0.0674813	-0.00879366	0.0384689	0.00148986	0.00119148	-0.0815873	-0.120218	-0.0535053	-0.00739428	-0.00376015	-0.100306
	10		140	175	142	157	136	120	145	154	141	120	153	163	164	135	101	119	91	116	245	251	251	99	137	136	106			10	-0.0282226	0.0707271	0.0264819	0.033634	0.0496781	-0.000361761	0.0579064	0.0613893	0.0172798	-0.0501863	0.0441834	0.0493246	0.0516825	0.0275572	0.0148716	0.0677992	-0.0439881	0	-0.0415538
		Total number of genes	1494	1487	1336	1453	1213	1201	1269	1337	1355	1347	1382	1455	1456	1267	976	1018	1007	1160	2696	2698	2695	820	992	1022	977
Cloud	1		31	40	44	36	9	13	22	29	30	13	4	13	13	19	78	67	100	74	7	7	6	151	29	41	79		Cloud	1	-0.19972	-0.115611	-0.0921462	-0.155505	-0.67004	-0.297676	-0.378563	-0.251932	-0.184691	-0.264455	-0.778151	-0.16709	-0.16709	-0.222306	-0.0901766	-0.202903	-0.147367	-0.250354	-0.063387
	2		35	92	27	68	71	45	76	62	62	47	40	45	49	47	107	117	92	108	4	7	5	145	50	57	22			2	-0.147013	0.246117	-0.304235	0.120702	0.226976	0.241593	0.159828	0.0780619	0.130579	0.2937	0.221849	0.372179	0.409163	0.171039	0.0471125	0.0392082	-0.183579	-0.086162	-0.306425
	3		54	34	52	37	11	15	21	74	28	24	32	16	12	45	91	170	132	164	3	5	4	138	36	48	24			3	0.0413123	-0.186192	-0.0195956	-0.143606	-0.582889	-0.235528	-0.398766	0.154902	-0.214655	0.00181334	0.124939	-0.0769134	-0.201852	0.152153	-0.0232298	0.201471	-0.0267932	0.0952581	-0.431364
	4		57	56	74	62	69	23	65	46	46	18	46	10	10	40	137	80	141	169	9	8	9	160	26	22	60			4	0.0647934	0.0305175	0.133633	0.0805845	0.214567	-0.0498919	0.0919276	-0.0515719	0.000945146	-0.123125	0.282547	-0.281033	-0.281033	0.101001	0.154449	-0.125888	0.001852	0.108301	0.0457575
	5		76	44	68	112	70	20	96	77	68	26	23	27	27	36	79	134	154	131	5	6	6	186	37	55	26			5	0.189732	-0.0742178	0.09691	0.337411	0.220816	-0.11059	0.261285	0.172161	0.170696	0.0365754	-0.0184834	0.15033	0.15033	0.0552432	-0.0846441	0.0981271	0.0401536	-0.00231448	-0.209515
	6		38	56	57	47	74	43	59	32	49	7	13	17	17	21	86	79	117	175	5	9	6	53	29	96	77			6	-0.111298	0.0305175	0.020276	-0.0397094	0.24495	0.221849	0.0498663	-0.20918	0.0283834	-0.5333	-0.266268	-0.0505844	-0.0505844	-0.17884	-0.0477728	-0.131351	-0.0791812	0.123452	-0.209515
	7		63	60	40	46	38	44	105	69	36	27	24	24	24	27	138	145	219	106	18	9	13	129	55	58	60			7	0.108259	0.0604807	-0.133539	-0.0490494	-0.0444985	0.231833	0.300204	0.124519	-0.10551	0.0529659	0	0.0991779	0.0991779	-0.0696955	0.157608	0.13239	0.193077	-0.0942799	0.346787
	8		38	53	47	37	29	23	33	59	48	15	13	13	13	31	80	87	148	128	7	8	9	174	25	39	18			8	-0.111298	0.00660537	-0.063501	-0.143606	-0.161884	-0.0498919	-0.202472	0.0565223	0.0194286	-0.202307	-0.266268	-0.16709	-0.16709	-0.00969757	-0.0791812	-0.0894585	0.0228946	-0.0123758	-0.063387
	9		66	25	70	36	27	11	22	42	52	13	10	19	19	21	57	65	121	109	10	6	7	202	64	44	53			9	0.128462	-0.31973	0.109499	-0.155505	-0.192918	-0.370227	-0.378563	-0.0910805	0.0541907	-0.264455	-0.380211	-0.00227977	-0.00227977	-0.17884	-0.226396	-0.216064	-0.0645817	-0.0821593	0.091515
	10		33	62	65	34	23	21	27	28	40	49	35	7	7	30	107	125	180	153	13	15	15	116	31	35	62			10	-0.172568	0.0747212	0.0773145	-0.180328	-0.262554	-0.0894004	-0.289622	-0.267172	-0.0597527	0.311798	0.163857	-0.435935	-0.435935	-0.023938	0.0471125	0.0679323	0.107905	0.0651057	0.205458
		Total number of genes	491	522	544	515	421	258	526	518	459	239	240	191	191	317	960	1069	1404	1317	81	80	80	1454	382	495	481
12 sectors																													12 sectors
Pangene category	Sectors		P. fuliginea Bsw20308	P. sp. 1_2015MBL_MicDiv	P. aliena EH1	P. arctica A 37-1-2	P. translucida KMM 520	P. translucida TAC125	P. nigrifaciens KMM 661	P. agarivorans DSM 14585	P. espejiana DSM 9414 ATCC 29659	P. sp. SM9913	P. tetraodonis GFC	P. issachenkonii KMM 3549	P. issachenkonii KCTC 12958	P. sp. 13-15	P. phenolica KCTC 12086	P. sp. NC201	P. piscicida DE2-B	P. rubra SCSIO 6842	P. luteoviolacea S4054	P. luteoviolacea S4054249	P. luteoviolacea S40542	P. tunicata D2	P. spongiae UST010723-006	P. spongiae SAO4-4	P. piratica OCN003		Pangene category	Sectors	P. fuliginea Bsw20308	P. sp. 1_2015MBL_MicDiv	P. aliena EH1	P. arctica A 37-1-2	P. translucida KMM 520	P. translucida TAC125	P. nigrifaciens KMM 661	P. agarivorans DSM 14585	P. espejiana DSM 9414 ATCC 29659	P. sp. SM9913	P. tetraodonis GFC	P. issachenkonii KMM 3549	P. issachenkonii KCTC 12958	P. sp. 13-15	P. phenolica KCTC 12086	P. sp. NC201	P. piscicida DE2-B	P. rubra SCSIO 6842	P. luteoviolacea S4054
Core	1		98	100	95	108	125	107	108	114	106	114	119	114	113	102	130	115	125	152	165	165	165	98	110	99	86		Core	1	-0.0410175	-0.0325793	-0.0568647	0.000173753	0.06366	-0.0042012	-0.00216566	0.0246613	-0.00727341	0.0236548	0.0436394	0.0226507	0.0201637	-0.0236434	0.0840574	0.0342022	0.0704143	0.148594	0.183899
	2		88	99	150	88	90	118	117	150	159	130	122	114	103	155	113	114	138	124	84	84	84	109	114	87	123			2	-0.0877609	-0.0369441	0.141503	-0.0887673	-0.0790075	0.038297	0.0325964	0.143848	0.168818	0.0806933	0.0544523	0.0226507	-0.0200775	0.158088	0.0231925	0.0304092	0.113383	0.0601717	-0.109306
	3		158	128	124	105	110	105	110	109	97	88	74	110	108	102	71	120	106	152	172	171	172	128	84	98	120			3	0.166414	0.0746307	0.0588333	-0.0120607	0.00814268	-0.0123957	0.00580327	0.00518297	-0.0458075	-0.0887673	-0.162676	0.00713853	0.000508986	-0.0236434	-0.178628	0.0526856	-0.00118981	0.148594	0.201943
	4		104	148	119	153	131	118	136	108	113	101	91	97	100	100	112	52	121	45	144	145	144	101	110	129	91			4	-0.0152102	0.137682	0.0409586	0.151441	0.0840213	0.038297	0.0979495	0.00118023	0.0204992	-0.0289286	-0.0728661	-0.0474824	-0.0329148	-0.0322435	0.0193321	-0.310492	0.0562897	-0.380037	0.124778
	5		101	95	109	84	81	110	83	125	123	109	111	113	113	123	66	124	118	93	17	17	17	121	107	115	92			5	-0.0279222	-0.0548557	0.00283814	-0.108971	-0.124765	0.00780771	-0.116511	0.0646665	0.0573258	0.00417649	0.0134155	0.0188243	0.0201637	0.0576616	-0.210342	0.066926	0.0453863	-0.0647671	-0.803136
	6		97	80	90	82	89	98	99	100	115	95	92	94	99	99	98	98	95	99	101	101	101	126	120	110	86			6	-0.0454718	-0.129489	-0.0803458	-0.119436	-0.08386	-0.0423589	-0.0399542	-0.0322435	0.0281186	-0.0555264	-0.0681197	-0.0611263	-0.0372796	-0.0366083	-0.0386599	-0.0352696	-0.0487721	-0.0376148	-0.0292636
	7		90	84	109	86	97	84	92	92	82	121	111	115	109	90	139	115	121	82	77	76	76	45	114	90	114			7	-0.078001	-0.1083	0.00283814	-0.0987516	-0.0464783	-0.109306	-0.0718016	-0.0684557	-0.118765	0.0495354	0.0134155	0.0264437	0.00451173	-0.078001	0.113129	0.0342022	0.0562897	-0.119436	-0.147094
	8		90	107	95	98	98	97	64	99	94	112	113	94	98	98	60	104	49	99	33	34	34	101	125	105	115			8	-0.078001	-0.0031955	-0.0568647	-0.0420239	-0.0420239	-0.0468132	-0.229409	-0.0366083	-0.0594514	0.015968	0.0211709	-0.0611263	-0.0416887	-0.0410175	-0.251735	-0.00946234	-0.3363	-0.0376148	-0.515071
	9		78	91	86	107	87	89	103	104	87	123	135	142	139	113	122	82	121	134	118	117	118	125	110	141	97			9	-0.140149	-0.0735379	-0.10009	-0.00386623	-0.0937308	-0.084195	-0.0227522	-0.0152102	-0.09306	0.0566551	0.0984263	0.118034	0.1101	0.0208349	0.0564739	-0.112682	0.0562897	0.0938548	0.038297
	10		121	121	95	134	116	108	139	115	136	98	95	97	96	110	155	135	76	89	123	123	124	150	122	97	116			10	0.0505418	0.0502061	-0.0568647	0.0938548	0.031208	-0.000161222	0.107425	0.0284543	0.10096	-0.0420239	-0.0541839	-0.0474824	-0.0506435	0.00914916	0.160446	0.103838	-0.145682	-0.08386	0.0563201
	11		155	151	119	147	157	148	138	74	80	120	129	111	120	121	133	143	141	126	164	151	150	117	77	126	123			11	0.158088	0.146398	0.0409586	0.134067	0.16265	0.136677	0.10429	-0.163012	-0.129489	0.0459312	0.0786822	0.0110688	0.0462665	0.0505418	0.0939657	0.12884	0.122723	0.0671205	0.181259
	12		113	90	109	104	115	115	114	103	102	85	100	98	97	80	87	74	65	101	99	112	112	79	77	78	108			12	0.0208349	-0.0783368	0.00283814	-0.0162167	0.0274478	0.0271129	0.0213154	-0.0194063	-0.0239791	-0.103831	-0.0319075	-0.0430281	-0.046143	-0.129154	-0.0903667	-0.157264	-0.213582	-0.0289286	-0.0379498
		Total number of genes	1293	1294	1300	1296	1296	1297	1303	1293	1294	1296	1292	1299	1295	1293	1286	1276	1276	1296	1297	1296	1297	1300	1270	1275	1271
Softcore	1		109	142	125	136	157	136	138	132	121	131	137	130	129	120	145	129	136	174	181	181	175	110	126	118	106		Softcore	1	-0.0442869	0.064326	0.00659058	0.0446912	0.107052	0.0458721	0.0522123	0.0349816	-0.00517697	0.0275399	0.0466951	0.0236239	0.0220369	-0.00878109	0.0811558	0.0282773	0.0615241	0.155254	0.166479
	2		96	107	166	115	100	132	118	159	170	142	134	127	116	165	128	135	161	148	114	114	120	113	108	108	131			2	-0.0994422	-0.0585786	0.129789	-0.0281499	-0.0888477	0.0329071	-0.0157848	0.115805	0.142487	0.062557	0.0370793	0.0134843	-0.0240948	0.129522	0.0269978	0.0480214	0.134811	0.0849665	-0.0342952
	3		179	148	140	115	126	121	125	123	114	113	106	120	118	140	78	135	114	164	194	193	184	143	125	111	124			3	0.17114	0.0822994	0.0558086	-0.0281499	0.0115228	-0.00488143	0.00924322	0.00431274	-0.0310575	-0.0366529	-0.0647196	-0.0111382	-0.0166708	0.0581657	-0.188118	0.0480214	-0.01511	0.129549	0.196602
	4		116	157	123	167	142	126	148	126	143	111	102	107	109	111	123	64	127	53	158	159	168	109	119	143	108			4	-0.0172554	0.107937	-0.000414324	0.133869	0.0634406	0.0127037	0.0825949	0.0147782	0.0673737	-0.0444084	-0.0814253	-0.0609357	-0.0511263	-0.0426394	0.00969292	-0.276132	0.0317889	-0.361019	0.107457
	5		110	108	118	94	90	123	95	133	136	119	119	126	124	135	73	133	131	97	23	23	23	133	131	126	118			5	-0.0403207	-0.0545386	-0.0184374	-0.11572	-0.134605	0.00223831	-0.109943	0.0382593	0.0455766	-0.0141844	-0.0144785	0.0100511	0.00486887	0.0423714	-0.216889	0.0415392	0.0452564	-0.0985235	-0.729472
	6		107	87	106	95	103	108	104	112	127	109	105	105	113	108	110	117	106	118	113	112	107	146	129	125	103			6	-0.0523296	-0.148443	-0.0650136	-0.111124	-0.0760105	-0.054243	-0.0706335	-0.0363744	0.0158414	-0.0523049	-0.0688362	-0.0691301	-0.0354744	-0.0545386	-0.0388195	-0.0141266	-0.046709	-0.0134132	-0.0381216
	7		106	99	124	96	110	98	109	108	89	139	128	133	127	107	152	129	128	91	90	89	95	48	141	102	129			7	-0.0564075	-0.0923271	0.00310225	-0.106577	-0.0474551	-0.0964407	-0.0502403	-0.0521686	-0.138572	0.0532834	0.0171845	0.0335322	0.0152509	-0.0585786	0.101631	0.0282773	0.0351951	-0.126254	-0.136958
	8		100	118	105	109	110	106	70	109	110	123	128	104	108	110	67	112	55	107	45	46	45	112	116	113	122			8	-0.0817134	-0.0160803	-0.0691301	-0.0514213	-0.0474551	-0.0623609	-0.242569	-0.0481659	-0.0465697	0.000173753	0.0171845	-0.0732861	-0.0551291	-0.0465697	-0.254137	-0.0330944	-0.331652	-0.0559114	-0.437988
	9		87	100	96	116	92	94	121	113	97	137	146	155	150	125	130	88	133	145	128	127	119	130	131	149	106			9	-0.142194	-0.0879623	-0.108048	-0.0243898	-0.12506	-0.114539	-0.00488143	-0.0325139	-0.101191	0.0469892	0.0743274	0.100012	0.0875384	0.00894768	0.0337312	-0.13783	0.0518368	0.0760728	0.0160099
	10		129	137	108	149	129	120	139	127	146	114	114	114	114	118	171	147	85	98	137	137	134	165	91	113	131			10	0.0288763	0.0487582	-0.0568957	0.0843385	0.021742	-0.00848555	0.055348	0.0182113	0.0763905	-0.0328265	-0.0331206	-0.0334146	-0.031648	-0.0160803	0.152784	0.0850049	-0.142596	-0.0940691	0.0455205
	11		177	165	143	163	174	164	160	82	93	139	140	134	131	138	169	164	165	155	178	162	176	154	124	137	138			11	0.16626	0.129522	0.0650166	0.12334	0.151702	0.127177	0.116453	-0.171779	-0.119479	0.0532834	0.0561025	0.0367854	0.0287185	0.0519168	0.147675	0.132531	0.145469	0.105036	0.15922
	12		133	102	124	118	140	141	142	138	124	99	118	123	133	93	98	98	76	111	120	137	135	91	91	92	119			12	0.0421383	-0.0793622	0.00310225	-0.0169657	0.0572803	0.0615523	0.0646215	0.0542867	0.00545935	-0.0940962	-0.0181435	-0.000414324	0.0352988	-0.119479	-0.0889861	-0.0910863	-0.191201	-0.0399722	-0.0120188
		Total number of genes	1449	1470	1478	1473	1473	1469	1469	1462	1470	1476	1477	1478	1472	1470	1444	1451	1417	1461	1481	1480	1481	1454	1432	1437	1435
Shell	1		142	119	115	109	95	92	105	123	112	117	119	119	119	102	70	94	97	83	170	174	175	90	89	84	78		Shell	1	0.0572927	-0.017409	0.0142464	-0.0454841	-0.0267822	-0.0364002	0.000518568	0.0431287	-0.00336627	0.0181733	0.0143939	-0.0168245	-0.00796103	-0.0148214	-0.0649968	0.0447351	0.0630973	-0.0660249	-0.120916
	2		118	112	89	121	76	86	70	79	111	72	83	87	87	76	76	73	75	95	239	238	239	49	89	80	76			2	-0.0231136	-0.0437379	-0.0970615	-0.000125245	-0.123692	-0.0656896	-0.175573	-0.149149	-0.00726132	-0.19268	-0.142075	-0.152852	-0.143989	-0.142608	-0.0292812	-0.0650699	-0.0486132	-0.00737939	0.027033
	3		104	114	98	133	120	103	112	99	107	105	99	139	123	90	109	49	112	81	150	143	143	70	83	107	79			3	-0.0779623	-0.0360511	-0.0552254	0.040941	0.0746754	0.0126492	0.0285473	-0.0511412	-0.0232005	-0.0288233	-0.0655178	0.0506433	0.00639712	-0.0691791	0.127332	-0.238197	0.125544	-0.076618	-0.175274
	4		110	107	90	91	107	105	115	109	128	138	137	141	139	105	77	105	71	103	192	195	197	84	90	92	109			4	-0.0536029	-0.0635722	-0.092209	-0.123869	0.024878	0.0210013	0.0400271	-0.00934991	0.0546257	0.0898665	0.0755675	0.0568477	0.0595068	-0.00223232	-0.0236041	0.0927965	-0.0724161	0.0277342	-0.0680637
	5		150	136	80	134	75	95	90	95	114	123	101	129	127	97	95	90	91	97	310	313	310	63	76	89	103			5	0.0810957	0.0405829	-0.143361	0.0441942	-0.129445	-0.0224644	-0.0664282	-0.0690528	0.00432055	0.0398925	-0.0568317	0.0182183	0.0202957	-0.0366499	0.0676288	0.0258497	0.0353669	0.00166874	0.139997
	6		132	154	130	106	119	117	120	122	104	132	133	127	125	117	104	76	70	101	246	242	243	62	85	73	81			6	0.0255783	0.0945648	0.0674919	-0.0576048	0.0710412	0.0679979	0.0585105	0.0395834	-0.035551	0.0705613	0.0626986	0.0114323	0.013402	0.0447642	0.106939	-0.0475792	-0.0785764	0.0192184	0.0395702
	7		121	131	130	150	99	102	117	107	128	118	120	118	120	121	71	94	101	91	263	262	265	88	80	51	76			7	-0.0122102	0.0243153	0.0674919	0.0931806	-0.00887061	0.00841216	0.0475151	-0.0173926	0.0546257	0.0218694	0.0180282	-0.0204894	-0.00432675	0.0593638	-0.0588365	0.0447351	0.0806469	-0.0260616	0.0685909
	8		146	116	129	137	106	107	103	127	132	113	117	129	127	133	104	71	86	115	300	306	303	65	71	79	96			8	0.0693573	-0.028498	0.0641383	0.05381	0.0208001	0.0291958	-0.00783351	0.0570273	0.0679896	0.00306585	0.00703282	0.0182183	0.0202957	0.10043	0.106939	-0.0771344	0.010824	0.0755948	0.125756
	9		144	142	163	135	128	119	121	99	90	91	93	109	101	109	58	105	71	94	213	208	207	41	74	66	58			9	0.0633669	0.0593324	0.165736	0.0474232	0.102704	0.075359	0.0621146	-0.0511412	-0.0983418	-0.0909712	-0.0926701	-0.054945	-0.0791866	0.0140049	-0.146667	0.0927965	-0.0724161	-0.0119751	-0.0229853
	10		105	121	124	112	104	99	120	129	123	130	143	138	138	98	51	75	72	107	215	217	214	55	73	95	79			10	-0.0738063	-0.0101706	0.0469702	-0.0336926	0.0125275	-0.00455281	0.0585105	0.0638133	0.0373208	0.0639308	0.094183	0.0475076	0.0563711	-0.0321955	-0.202525	-0.0533315	-0.066342	0.0442808	-0.0189264
	11		100	89	72	94	77	67	74	115	83	94	110	112	110	99	81	79	73	98	176	173	172	71	74	95	67			11	-0.0949956	-0.143566	-0.189119	-0.109783	-0.118015	-0.174113	-0.151439	0.0139214	-0.133506	-0.0768847	-0.0197604	-0.0431534	-0.0421153	-0.0277864	-0.0016098	-0.0307657	-0.0603516	0.00612309	-0.105852
	12		122	146	116	131	107	109	112	133	123	114	127	137	139	120	80	107	88	95	222	227	227	82	108	111	75			12	-0.00863577	0.0713969	0.0180065	0.0343607	0.024878	0.0372385	0.0285473	0.0770752	0.0373208	0.00689225	0.0426507	0.0443491	0.0595068	0.0557596	-0.00700483	0.100991	0.0208082	-0.00737939	-0.00501191
		Total number of genes	1494	1487	1336	1453	1213	1201	1259	1337	1355	1347	1382	1485	1455	1267	976	1018	1007	1160	2696	2698	2695	820	992	1022	977
Cloud	1		29	39	23	35	8	12	17	25	27	12	4	11	12	18	65	57	87	63	6	5	4	100	25	38	56		Cloud	1	-0.149328	-0.0472509	-0.294516	-0.0883842	-0.641837	-0.253083	-0.411182	-0.237035	-0.151094	-0.219862	-0.698796	-0.160286	-0.122497	-0.166432	-0.0900029	-0.193748	-0.128493	-0.24089	-0.0509788
	2		69	81	38	64	64	42	73	22	27	26	23	28	37	15	76	92	84	97	5	8	7	118	27	52	33			2	0.227123	0.27017	-0.0764603	0.173728	0.261253	0.290985	0.221692	-0.292552	-0.151094	0.11593	0.0608716	0.24548	0.366523	-0.245613	-0.0221026	0.0141651	-0.143733	-0.053459	-0.13016
	3		17	38	30	32	14	16	24	58	55	42	35	28	19	30	93	96	94	75	2	4	3	87	49	42	37			3	-0.381278	-0.0585319	-0.179123	-0.127302	-0.398799	-0.128145	-0.26142	0.128453	0.157905	0.324206	0.243212	0.24548	0.0770752	0.055417	0.0655667	0.0326485	-0.0948843	-0.16517	-0.5281
	4		54	36	82	42	11	9	17	45	30	11	21	13	12	43	80	131	122	164	4	6	5	108	25	23	23			4	0.120667	-0.082013	0.25757	-0.00920294	-0.503534	-0.378022	-0.411182	0.0182378	-0.105336	-0.25765	0.0213631	-0.087735	-0.122497	0.211764	0.000173753	0.167649	0.0183477	0.174613	-0.22707
	5		37	36	32	52	95	22	95	52	16	18	40	8	9	26	112	77	98	146	6	4	7	103	25	22	19			5	-0.0435248	-0.082013	-0.151094	0.0835511	0.432797	0.010158	0.336093	0.0810286	-0.378338	-0.0437704	0.301204	-0.298588	-0.247436	-0.00673092	0.146302	-0.063132	-0.076786	0.124122	-0.0509788
	6		44	39	60	99	38	15	55	46	39	19	22	22	22	37	66	107	144	101	5	6	4	73	24	46	56			6	0.0317262	-0.0472509	0.121907	0.363183	0.0348565	-0.156173	0.0987319	0.0277831	0.00860692	-0.0202893	0.0415664	0.140744	0.140744	0.146497	-0.0833723	0.0797611	0.0903504	-0.0359094	-0.13016
	7		73	50	45	34	51	40	54	65	67	3	12	14	13	32	57	77	91	138	5	9	6	164	31	70	35			7	0.251596	0.0606545	-0.00303139	-0.100973	0.162643	0.269795	0.090763	0.177939	0.243617	-0.821922	-0.221675	-0.0555503	-0.087735	0.0834457	-0.147041	-0.063132	-0.108971	0.0996483	-0.13016
	8		31	46	35	34	44	27	108	24	42	24	15	21	25	16	109	97	179	118	14	8	11	123	28	65	22			8	-0.120365	0.0244423	-0.112176	-0.100973	0.0985256	0.0990991	0.391793	-0.254764	0.0407916	0.0811683	-0.124765	0.120541	0.196262	-0.217584	0.13451	0.037149	0.184841	0.0316512	0.316998
	9		46	38	39	29	40	27	22	68	31	12	21	13	9	28	92	107	116	81	7	5	5	128	30	45	76			9	0.0510313	-0.0585319	-0.0651793	-0.170054	0.0571329	0.0990991	-0.299208	0.197534	-0.091096	-0.219862	0.0213631	-0.087735	-0.247436	0.0254538	0.0608716	0.0797611	-0.00355412	-0.131746	0.015968
	10		51	42	44	39	27	21	19	24	44	16	3	8	8	23	58	58	143	115	6	6	8	81	36	20	30			10	0.0958437	-0.0150662	-0.0127912	-0.0413876	-0.113563	-0.0100454	-0.362877	-0.254764	0.060995	-0.0949229	-0.823735	-0.298588	-0.298588	-0.0599764	-0.139488	-0.186195	0.0873239	0.0204671	-0.0509788
	11		21	26	55	23	9	9	26	63	44	27	10	19	19	24	50	57	82	87	8	5	6	75	55	40	35			11	-0.289507	-0.223342	0.0841188	-0.270724	-0.590685	-0.378022	-0.226657	0.164366	0.060995	0.132321	-0.300856	0.0770752	0.0770752	-0.041493	-0.203946	-0.193748	-0.154198	-0.100712	0.07396
	12		19	51	61	32	20	18	16	26	37	29	34	6	6	25	102	113	164	132	13	14	14	142	27	32	59			12	-0.332973	0.0692547	0.129086	-0.127302	-0.243897	-0.0769922	-0.437511	-0.220001	-0.014256	0.163355	0.230623	-0.423527	-0.423527	-0.0237643	0.105684	0.103456	0.146832	0.0803432	0.284813
		Total number of genes	491	522	544	515	421	258	526	518	459	239	240	191	191	317	960	1069	1404	1317	81	80	80	1302	382	495	481
[truncated: 10 more columns]

## Sheet: Sheet 3
Chromid
Raw number of core, softcore, shell and cloud genes in each section in 25 Pseudoalteromonas genomes																													Log10 ratio of: The probability of a gene belonging to a sector (#Genes in a sector/#Total number of genes) / The probability given an equal distribution of genes between all sectors (1/#sectors)
4 sectors																													4 sectors
Pangene category	Sectors		P. fuliginea Bsw20308	P. sp. 1_2015MBL_MicDiv	P. aliena EH1	P. arctica A 37-1-2	P. translucida KMM 520	P. translucida TAC125	P. nigrifaciens KMM 661	P. agarivorans DSM 14585	P. espejiana DSM 9414 ATCC 29659	P. sp. SM9913	P. tetraodonis GFC	P. issachenkonii KMM 3549	P. issachenkonii KCTC 12958	P. sp. 13-15	P. phenolica KCTC 12086	P. sp. NC201	P. piscicida DE2-B	P. rubra SCSIO 6842	P. luteoviolacea S4054	P. luteoviolacea S4054249	P. luteoviolacea S40542	P. tunicata D2	P. spongiae UST010723-006	P. spongiae SAO4-4	P. piratica OCN003		Pangene category	Sectors	P. fuliginea Bsw20308	P. sp. 1_2015MBL_MicDiv	P. aliena EH1	P. arctica A 37-1-2	P. translucida KMM 520	P. translucida TAC125	P. nigrifaciens KMM 661	P. agarivorans DSM 14585	P. espejiana DSM 9414 ATCC 29659	P. sp. SM9913	P. tetraodonis GFC	P. issachenkonii KMM 3549	P. issachenkonii KCTC 12958	P. sp. 13-15	P. phenolica KCTC 12086	P. sp. NC201	P. piscicida DE2-B	P. rubra SCSIO 6842	P. luteoviolacea S4054
Core	1		22	22	17	22	22	15	15	15	14	16	16	16	16	17	29	15	15	11	11	11	11	15	20	20	19		Core	1	-0.0849011	-0.0849011	-0.200915	-0.0808232	-0.0849011	-0.243038	-0.243038	-0.247155	-0.277118	-0.219126	-0.219126	-0.219126	-0.219126	-0.196875	0	-0.332438	-0.332438	-0.389971	-0.385931
	2		2	3	12	6	4	12	10	10	11	12	10	10	10	10	10	14	14	17	14	14	14	7	53	55	24			2	-1.12629	-0.950203	-0.352183	-0.645095	-0.825264	-0.339948	-0.419129	-0.423246	-0.381853	-0.344065	-0.423246	-0.423246	-0.423246	-0.427324	-0.462398	-0.362402	-0.362402	-0.200915	-0.281196
	3		32	31	29	28	32	28	29	30	29	27	29	29	29	29	10	33	33	8	24	24	24	28	43	41	69			3	0.0778262	0.0640379	0.0310342	0.0239122	0.0778262	0.0280287	0.0432687	0.0538754	0.0391521	0.00811789	0.0391521	0.0391521	0.0391521	0.0350742	-0.462398	0.00998422	0.00998422	-0.528274	-0.0471125
	4		51	51	50	50	49	50	51	51	52	51	51	51	51	51	67	67	67	72	58	58	57	50	15	15	19			4	0.280246	0.280246	0.267606	0.275724	0.262872	0.279841	0.288441	0.284324	0.292757	0.284324	0.284324	0.284324	0.284324	0.280246	0.363677	0.317545	0.317545	0.425969	0.336104
		Total number of genes	107	107	108	106	107	105	105	106	106	106	106	106	106	107	116	129	129	108	107	107	106	100	131	131	131
Softcore	1		27	27	21	27	28	19	13	19	16	21	21	21	21	20	33	19	19	17	14	14	14	17	30	30	29		Softcore	1	-0.0838475	-0.0871502	-0.202826	-0.0871502	-0.0647253	-0.236458	-0.377418	-0.23976	-0.311091	-0.199572	-0.199572	-0.196295	-0.196295	-0.214181	-0.0347621	-0.312311	-0.306707	-0.281434	-0.365755
	2		4	6	16	9	7	16	35	13	15	16	14	14	14	14	11	17	17	19	16	16	16	9	65	69	31			2	-0.913151	-0.740363	-0.320925	-0.564271	-0.666785	-0.311091	0.0527064	-0.404571	-0.33912	-0.317672	-0.375664	-0.372386	-0.372386	-0.369083	-0.511883	-0.360616	-0.355012	-0.23313	-0.307763
	3		39	37	35	34	37	34	13	36	35	33	34	35	35	35	15	40	40	11	29	29	29	32	54	51	83			3	0.0758533	0.0496878	0.0190232	0.012965	0.0563184	0.0162676	-0.377418	0.0377886	0.0288567	-0.00327771	0.00968727	0.0255541	0.0255541	0.0288567	-0.377185	0.0109954	0.0165993	-0.470491	-0.0494854
	4		61	62	62	62	58	62	63	64	65	63	64	62	62	62	84	80	78	83	71	71	71	61	21	21	25			4	0.270119	0.273878	0.267347	0.273878	0.251545	0.27718	0.307979	0.287666	0.297702	0.277549	0.284388	0.273878	0.273878	0.27718	0.371003	0.312025	0.306634	0.407195	0.339375
		Total number of genes	131	132	134	132	130	131	124	132	131	133	133	132	132	131	143	156	154	130	130	130	130	119	170	171	168
Shell	1		119	112	96	101	96	81	79	109	85	126	126	130	130	97	85	96	88	83	240	240	238	60	246	246	216		Shell	1	-0.0134745	-0.0245003	-0.0252632	-0.0341001	-0.00784553	-0.0396833	-0.0823763	-0.051595	-0.0896974	0.059966	0.048254	0.0656958	0.0666685	0.00563295	-0.00634018	-0.0316188	-0.0193052	-0.0688115	0.0304482
	2		147	142	110	131	84	99	101	141	115	127	118	116	116	116	93	91	88	93	239	239	239	66	207	200	233			2	0.0782958	0.07857	0.0338583	0.0788499	-0.0658375	0.0474668	0.024318	0.0601976	0.0415815	0.0633992	0.0197655	0.0162105	0.0171831	0.0833192	0.0327238	-0.0548487	-0.0193052	-0.0194067	0.0286349
	3		112	103	104	111	121	98	107	128	112	96	99	95	95	91	93	118	96	105	221	222	224	48	225	238	220			3	-0.0398035	-0.0608811	0.00949892	0.00690153	0.0926686	0.0430577	0.0493804	0.0181885	0.0301017	-0.0581333	-0.0564814	-0.0705239	-0.0695513	-0.0220974	0.0327238	0.0579919	0.0184834	0.0332997	-0.00537077
	4		113	117	97	94	90	77	95	113	106	90	108	106	105	79	74	108	96	108	195	195	195	56	220	207	208			4	-0.0359431	-0.00553249	-0.0207627	-0.0652936	-0.0358743	-0.0616776	-0.00227977	-0.0359431	0.00618957	-0.086162	-0.0186928	-0.0229417	-0.0260856	-0.0835117	-0.0665274	0.0195337	0.0184834	0.0455341	-0.0597284
		Total number of genes	491	474	407	437	391	355	382	491	418	439	451	447	446	383	345	413	368	389	895	896	896	230	898	891	877
Cloud	1		54	61	43	32	36	20	42	52	59	13	13	9	9	43	102	145	153	160	6	6	8	123	84	104	115		Cloud	1	0.0791812	0.075636	0.0180445	-0.0263289	0.00914338	0.09691	0.200003	0.119406	0.150196	0.0170333	0	-0.207125	-0.207125	0.0623422	0.0297352	0.0785826	0.0463887	0.0819041	-0.0347621
	2		49	52	51	40	69	25	26	46	50	17	28	30	30	30	96	152	155	148	5	5	5	105	88	131	116			2	0.0369836	0.00630947	0.0921462	0.0705811	0.29169	0.19382	-0.00827253	0.0661607	0.0783135	0.133539	0.333215	0.315753	0.315753	-0.094005	0.00340625	0.0990582	0.052029	0.0480458	-0.113943
	3		49	60	41	35	22	7	18	36	33	11	7	10	10	54	112	102	124	144	10	9	7	100	81	111	77			3	0.0369836	0.0684574	-0.0026401	0.0125891	-0.204736	-0.359022	-0.167973	-0.0402946	-0.102143	-0.0555173	-0.268845	-0.161368	-0.161368	0.161267	0.070353	-0.0741852	-0.044881	0.0361466	0.187087
	4		28	32	30	29	14	12	20	24	25	9	4	9	9	22	71	85	118	78	5	9	9	94	125	159	137			4	-0.206054	-0.204544	-0.138303	-0.0690809	-0.401031	-0.124939	-0.122216	-0.216386	-0.222716	-0.142668	-0.511883	-0.207125	-0.207125	-0.228704	-0.127607	-0.153366	-0.0664207	-0.230121	-0.113943
		Total number of genes	180	205	165	136	141	64	106	158	167	50	52	58	58	149	381	484	550	530	26	29	29	422	378	505	445
6 sectors																													6 sectors
Pangene category	Sectors		P. fuliginea Bsw20308	P. sp. 1_2015MBL_MicDiv	P. aliena EH1	P. arctica A 37-1-2	P. translucida KMM 520	P. translucida TAC125	P. nigrifaciens KMM 661	P. agarivorans DSM 14585	P. espejiana DSM 9414 ATCC 29659	P. sp. SM9913	P. tetraodonis GFC	P. issachenkonii KMM 3549	P. issachenkonii KCTC 12958	P. sp. 13-15	P. phenolica KCTC 12086	P. sp. NC201	P. piscicida DE2-B	P. rubra SCSIO 6842	P. luteoviolacea S4054	P. luteoviolacea S4054249	P. luteoviolacea S40542	P. tunicata D2	P. spongiae UST010723-006	P. spongiae SAO4-4	P. piratica OCN003		Pangene category	Sectors	P. fuliginea Bsw20308	P. sp. 1_2015MBL_MicDiv	P. aliena EH1	P. arctica A 37-1-2	P. translucida KMM 520	P. translucida TAC125	P. nigrifaciens KMM 661	P. agarivorans DSM 14585	P. espejiana DSM 9414 ATCC 29659	P. sp. SM9913	P. tetraodonis GFC	P. issachenkonii KMM 3549	P. issachenkonii KCTC 12958	P. sp. 13-15	P. phenolica KCTC 12086	P. sp. NC201	P. piscicida DE2-B	P. rubra SCSIO 6842	P. luteoviolacea S4054
Core	1		14	14	16	15	15	11	14	14	4	15	15	15	15	16	28	10	13	9	8	8	8	9	18	18	18		Core	1	-0.105191	-0.105191	-0.0512394	-0.0711502	-0.0752281	-0.201732	-0.0969969	-0.101113	-0.645181	-0.0711502	-0.0711502	-0.0711502	-0.0711502	-0.0471994	0.160764	-0.332525	-0.218582	-0.301117	-0.348229
	2		10	10	8	9	9	13	8	10	18	10	8	8	8	8	3	12	9	5	16	16	16	6	5	5	5			2	-0.251319	-0.251319	-0.352269	-0.292999	-0.297077	-0.129182	-0.340035	-0.247241	0.00803104	-0.247241	-0.344151	-0.344151	-0.344151	-0.348229	-0.809272	-0.253344	-0.378283	-0.556389	-0.0471994
	3		0	0	5	4	2	3	4	1	3	1	3	2	2	3	8	7	9	14	1	1	1	3	50	52	20			3	#NUM!	#NUM!	-0.556389	-0.645181	-0.950289	-0.766004	-0.641065	-1.24724	-0.77012	-1.24724	-0.77012	-0.946211	-0.946211	-0.774198	-0.383304	-0.487427	-0.378283	-0.109231	-1.25132
	4		18	18	22	26	24	26	22	12	16	22	17	18	18	17	8	16	21	5	6	6	6	18	34	34	67			4	0.00395313	0.00395313	0.0870633	0.167732	0.128892	0.171848	0.0992978	-0.16806	-0.0431215	0.0951812	-0.0167925	0.00803104	0.00803104	-0.0208705	-0.383304	-0.128405	-0.010306	-0.556389	-0.473168
	5		21	18	13	8	14	9	14	21	20	13	18	20	20	18	7	28	24	9	48	48	48	21	14	16	12			5	0.0708999	0.00395313	-0.141416	-0.344151	-0.105191	-0.288882	-0.0969969	0.0749778	0.0537885	-0.133298	0.00803104	0.0537885	0.0537885	0.00395313	-0.441296	0.114633	0.0476859	-0.301117	0.429922
	6		44	47	44	44	43	43	43	48	45	45	45	43	43	45	62	56	53	66	28	28	27	43	10	6	9			6	0.392133	0.420778	0.388093	0.396211	0.382149	0.390344	0.390344	0.434	0.405971	0.405971	0.405971	0.386227	0.386227	0.401893	0.505998	0.415663	0.391751	0.564185	0.195839
		Total number of genes	107	107	108	106	107	105	105	106	106	106	106	106	106	107	116	129	129	108	107	107	106	100	131	131	131
Softcore	1		17	17	20	18	19	12	16	16	5	19	19	19	19	18	32	13	16	12	11	11	11	11	25	25	25		Softcore	1	-0.108758	-0.112061	-0.0480104	-0.087237	-0.0571254	-0.260026	-0.131759	-0.13839	-0.640237	-0.0670336	-0.0670336	-0.0637559	-0.0637559	-0.0839344	0.127878	-0.301117	-0.205336	-0.256698	-0.294486
	2		14	14	10	13	12	18	11	15	20	14	11	10	10	11	4	14	11	8	17	17	17	6	11	11	10			2	-0.193079	-0.196381	-0.34904	-0.228566	-0.256698	-0.0839344	-0.294486	-0.166418	-0.0381769	-0.199659	-0.304395	-0.34251	-0.34251	-0.297814	-0.775212	-0.268932	-0.368064	-0.432789	-0.10543
	3		0	0	7	5	4	5	7	1	6	2	5	4	4	5	8	9	11	16	2	2	2	5	59	63	25			3	#NUM!	#NUM!	-0.503942	-0.64354	-0.733819	-0.640237	-0.490781	-1.34251	-0.561056	-1.04476	-0.646817	-0.74045	-0.74045	-0.640237	-0.474182	-0.460818	-0.368064	-0.131759	-1.03485
	4		20	20	26	31	27	31	25	14	18	25	18	20	20	18	13	20	25	7	8	8	8	21	41	41	80			4	-0.0381769	-0.0414795	0.0659329	0.148852	0.0954848	0.152155	0.0620611	-0.196381	-0.0839344	0.0521528	-0.0905147	-0.0414795	-0.0414795	-0.0839344	-0.263328	-0.11403	-0.0115163	-0.490781	-0.432789
	5		28	25	19	13	20	15	21	28	28	19	25	30	30	26	11	33	29	10	57	57	57	24	19	21	17			5	0.107951	0.0554305	-0.0702868	-0.228566	-0.034849	-0.163116	-0.0136597	0.104649	0.107951	-0.0670336	0.0521528	0.134612	0.134612	0.0757665	-0.335879	0.103454	0.0529417	-0.335879	0.419996
	6		52	56	52	52	48	50	50	58	54	54	55	49	49	53	75	67	62	77	35	35	35	52	15	10	11			6	0.376796	0.405678	0.366963	0.373494	0.345362	0.359763	0.363091	0.420918	0.393187	0.386607	0.394575	0.347687	0.347687	0.385069	0.49779	0.411015	0.382935	0.550612	0.208189
		Total number of genes	131	132	134	132	130	131	130	132	131	133	133	132	132	131	143	156	154	130	130	130	130	119	170	171	168
Shell	1		78	65	70	77	68	56	61	67	62	73	74	75	75	67	44	66	67	59	166	166	164	40	163	173	145		Shell	1	-0.0191499	-0.0848006	0.013568	0.0240737	0.0183966	-0.0239759	-0.0186691	-0.0869423	-0.0507202	-0.00107726	-0.00688042	0.00281814	0.0037908	0.0209404	-0.116302	-0.0183417	0.0382914	-0.0410332	0.0463495
	2		83	94	52	67	58	61	56	77	58	80	72	73	73	64	79	56	59	65	159	159	159	37	179	166	133			2	0.00783363	0.0754139	-0.115527	-0.0363422	-0.0506844	0.0131659	-0.0558109	-0.0265264	-0.0796839	0.0386899	-0.0187796	-0.00892026	-0.0079476	0.0010456	0.137872	-0.0896976	-0.0169314	0.00102816	0.0276385
	3		87	85	84	88	54	63	73	89	80	85	84	82	82	82	55	65	55	52	154	154	154	41	111	107	171			3	0.0282748	0.031705	0.0927493	0.0820656	-0.0817186	0.0271766	0.0593239	0.0363729	0.0599781	0.0650188	0.0481671	0.0415707	0.0425434	0.108679	-0.019392	-0.0249723	-0.0474207	-0.0958819	0.0137621
	4		78	71	64	77	78	64	71	94	78	63	69	70	70	56	58	87	77	77	162	163	165	33	148	160	130			4	-0.0191499	-0.0464556	-0.02535	0.0240737	0.0779822	0.034016	0.0472594	0.0601108	0.0489827	-0.0650596	-0.0372631	-0.0271451	-0.0261724	-0.0569463	0.0036733	0.101634	0.0987073	0.0746055	0.0357564
	5		100	90	71	68	67	60	69	99	76	78	75	88	88	64	60	69	50	58	103	103	103	40	138	130	158			5	0.0887555	0.0565286	0.0197283	-0.0299081	0.0119624	0.0059873	0.0348501	0.0826181	0.0377017	0.0276945	-0.00105088	0.0722395	0.0732122	0.0010456	0.0183966	0.000963439	-0.0888134	-0.0484572	-0.160921
	6		63	69	66	60	66	51	52	65	64	60	77	59	58	50	49	70	60	78	151	151	151	39	159	155	140			6	-0.111904	-0.0588649	-0.0119861	-0.0842658	0.00543158	-0.0645938	-0.0879956	-0.100104	-0.0369319	-0.0862489	0.0103786	-0.101391	-0.107842	-0.106164	-0.0695586	0.00721239	-0.00963217	0.0802094	0.00521831
		Total number of genes	489	474	407	437	391	355	382	491	418	439	451	447	446	383	345	413	368	389	895	896	896	230	898	891	877
Cloud	1		25	38	30	25	13	12	23	37	53	8	7	6	6	15	65	101	97	109	3	3	5	69	52	62	70		Cloud	1	-0.0792681	0.0460941	0.0377017	0.0424655	-0.257211	0.0510657	0.114486	0.147609	0.279624	-0.0178156	-0.0928409	-0.207212	-0.207212	-0.219031	0.00891439	0.0975404	0.0244734	0.091215	-0.159788
	2		43	32	35	20	50	21	33	28	22	6	17	17	17	45	57	110	110	107	4	4	4	77	50	83	97			2	0.15626	-0.0285395	0.104649	-0.0544445	0.327815	0.294104	0.271272	0.0265653	-0.102229	-0.142754	0.29251	0.245085	0.245085	0.258091	-0.0481241	0.134612	0.0790944	0.0831723	-0.034849
	3		33	35	29	27	42	12	20	30	34	13	11	14	14	13	77	86	114	92	4	4	4	74	70	90	64			3	0.0413058	0.0103786	0.0229785	0.0758893	0.252095	0.0510657	0.0537885	0.0565286	0.0868268	0.193038	0.103454	0.160764	0.160764	-0.281179	0.0824918	0.0277175	0.0946066	0.0175764	-0.034849
	4		42	49	30	12	15	4	4	32	24	12	13	10	10	46	69	73	78	96	10	9	7	66	51	59	50			4	0.146041	0.156507	0.0377017	-0.276293	-0.195063	-0.426056	-0.645181	0.0845573	-0.0644408	0.158276	0.176004	0.0146364	0.0146364	0.267636	0.0348501	-0.0434581	-0.0702037	0.0360598	0.363091
	5		12	25	30	39	13	5	10	13	16	3	0	2	2	10	69	58	81	92	0	0	0	76	83	109	65			5	-0.398027	-0.135749	0.0377017	0.23559	-0.257211	-0.329146	-0.247241	-0.306649	-0.240532	-0.443784	#NUM!	-0.684334	-0.684334	-0.395122	0.0348501	-0.143353	-0.0538133	0.0175764	#NUM!
	6		25	26	11	13	8	10	16	18	18	8	4	9	9	20	45	56	70	34	5	9	9	60	72	102	99			6	-0.0792681	-0.118716	-0.398027	-0.241531	-0.468065	-0.0281156	-0.0431215	-0.16532	-0.18938	-0.0178156	-0.335879	-0.0311211	-0.0311211	-0.0940919	-0.150786	-0.158593	-0.1172	-0.414733	0.0620611
		Total number of genes	180	205	165	136	141	64	106	158	167	50	52	58	58	149	382	484	550	530	26	29	29	422	378	505	445
8 sectors																													8 sectors
Pangene category	Sectors		P. fuliginea Bsw20308	P. sp. 1_2015MBL_MicDiv	P. aliena EH1	P. arctica A 37-1-2	P. translucida KMM 520	P. translucida TAC125	P. nigrifaciens KMM 661	P. agarivorans DSM 14585	P. espejiana DSM 9414 ATCC 29659	P. sp. SM9913	P. tetraodonis GFC	P. issachenkonii KMM 3549	P. issachenkonii KCTC 12958	P. sp. 13-15	P. phenolica KCTC 12086	P. sp. NC201	P. piscicida DE2-B	P. rubra SCSIO 6842	P. luteoviolacea S4054	P. luteoviolacea S4054249	P. luteoviolacea S40542	P. tunicata D2	P. spongiae UST010723-006	P. spongiae SAO4-4	P. piratica OCN003		Pangene category	Sectors	P. fuliginea Bsw20308	P. sp. 1_2015MBL_MicDiv	P. aliena EH1	P. arctica A 37-1-2	P. translucida KMM 520	P. translucida TAC125	P. nigrifaciens KMM 661	P. agarivorans DSM 14585	P. espejiana DSM 9414 ATCC 29659	P. sp. SM9913	P. tetraodonis GFC	P. issachenkonii KMM 3549	P. issachenkonii KCTC 12958	P. sp. 13-15	P. phenolica KCTC 12086	P. sp. NC201	P. piscicida DE2-B	P. rubra SCSIO 6842	P. luteoviolacea S4054
Core	1		10	14	9	12	14	6	10	8	2	13	11	11	11	12	21	9	9	8	8	8	8	8	15	15	14		Core	1	-0.126294	0.0198342	-0.176091	-0.0430346	0.0198342	-0.339948	-0.118099	-0.314394	-0.821186	-0.00827253	-0.0808232	-0.0808232	-0.0808232	-0.0471125	0.160851	-0.253257	-0.253257	-0.227244	-0.223204
	2		12	8	8	10	8	9	5	18	13	3	5	5	5	5	8	6	6	3	3	3	3	6	5	5	5			2	-0.0471125	-0.223204	-0.227244	-0.122216	-0.223204	-0.163857	-0.419129	0.0377886	-0.00827253	-0.645095	-0.423246	-0.423246	-0.423246	-0.427324	-0.258278	-0.429348	-0.429348	-0.653213	-0.649173
	3		2	2	9	2	2	9	7	5	9	9	9	9	9	9	2	12	13	7	13	13	13	1	13	13	6			3	-0.825264	-0.825264	-0.176091	-0.821186	-0.825264	-0.163857	-0.273001	-0.518514	-0.167973	-0.167973	-0.167973	-0.167973	-0.167973	-0.172051	-0.860338	-0.128318	-0.0935564	-0.285236	-0.0123504
	4		0	1	3	4	2	3	3	3	1	3	1	0	0	1	8	2	3	10	2	2	2	3	40	42	12			4	#NUM!	-1.12629	-0.653213	-0.520156	-0.825264	-0.640978	-0.640978	-0.740363	-1.12222	-0.645095	-1.12222	#NUM!	#NUM!	-1.12629	-0.258278	-0.90647	-0.730378	-0.130334	-0.825264
	5		10	12	13	15	16	15	15	12	3	15	10	14	14	5	3	9	8	2	5	5	5	17	33	31	59			5	-0.126294	-0.0471125	-0.0163904	0.0538754	0.0778262	0.0579919	0.0579919	-0.138303	-0.645095	0.0538754	-0.122216	0.0239122	0.0239122	-0.427324	-0.684247	-0.253257	-0.30441	-0.829304	-0.427324
	6		22	19	15	12	15	13	14	23	20	12	19	16	16	23	7	24	23	6	18	18	18	15	10	10	16			6	0.216129	0.15246	0.0457575	-0.0430346	0.0497975	-0.00415596	0.0280287	0.144244	0.178814	-0.0430346		0.0819041	0.0819041	0.235434	-0.31627	0.172712	0.154228	-0.352183	0.128979
	7		22	12	13	13	18	19	20	18	15	22	18	20	20	12	17	23	20	25	39	39	39	25	12	12	14			7	0.216129	-0.0471125	-0.0163904	-0.00827253	0.128979	0.160654	0.182931	0.0377886	0.0538754	0.220207	0.133057	0.178814	0.178814	-0.0471125	0.0690809	0.154228	0.0935303	0.267606	0.464771
	8		29	39	38	38	32	31	31	45	43	29	33	31	31	40	50	44	47	47	19	19	18	25	3	3	5			8	0.336104	0.464771	0.44945	0.457568	0.378856	0.373262	0.373262	0.435729	0.511253	0.340182	0.396298	0.369146	0.369146	0.475766	0.537602	0.435953	0.464598	0.541764	0.15246
		Total number of genes	107	107	108	106	107	105	105	132	106	106	106	106	106	107	116	129	129	108	107	107	106	100	131	131	131
Softcore	1		11	15	11	13	17	7	11	3	3	15	13	13	13	13	24	11	12	10	11	11	11	10	18	18	17		Softcore	1	-0.172789	-0.0413927	-0.182622	-0.103541	0.0195956	-0.369083	-0.169461	-0.73706	-0.73706	-0.0446704	-0.106818	-0.103541	-0.103541	-0.100238	0.127965	-0.248642	-0.205249	-0.210853	-0.169461
	2		16	12	11	15	11	12	8	14	14	6	8	8	8	7	9	8	7	7	3	3	3	6	12	12	12			2	-0.0100613	-0.138303	-0.182622	-0.0413927	-0.169461	-0.135	-0.307763	-0.0680533	-0.0680533	-0.44261	-0.317672	-0.314394	-0.314394	-0.369083	-0.298004	-0.386945	-0.439333	-0.365755	-0.733732
	3		4	4	11	3	4	11	9	13	13	12	12	12	12	12	3	13	15	7	15	15	15	2	17	17	8			3	-0.612121	-0.615424	-0.182622	-0.740363	-0.608793	-0.172789	-0.256611	-0.100238	-0.100238	-0.14158	-0.14158	-0.138303	-0.138303	-0.135	-0.775125	-0.176091	-0.108339	-0.365755	-0.0347621
	4		0	2	4	5	3	5	4	1	1	4	2	0	0	2	8	4	4	12	2	2	2	4	48	52	16			4	#NUM!	-0.916454	-0.621955	-0.518514	-0.733732	-0.515211	-0.608793	-1.21418	-1.21418	-0.618702	-0.919732	#NUM!	#NUM!	-0.913151	-0.349156	-0.687975	-0.682371	-0.131672	-0.909823
	5		12	13	14	16	17	16	16	4	4	16	11	16	16	6	6	11	10	2	7	7	7	19	39	37	68			5	-0.135	-0.103541	-0.0778868	-0.013364	0.0195956	-0.0100613	-0.00673338	-0.612121	-0.612121	-0.0166417	-0.179369	-0.013364	-0.013364	-0.43603	-0.474095	-0.248642	-0.284431	-0.909823	-0.365755
	6		27	24	20	17	19	18	19	23	23	17	23	21	21	27	9	29	28	9	21	21	21	17	15	14	22			6	0.217182	0.162727	0.0770152	0.012965	0.0679002	0.0410912	0.0679002	0.147547	0.147547	0.00968727	0.140966	0.104735	0.104735	0.217182	-0.298004	0.172363	0.162727	-0.256611	0.111366
	7		27	17	18	18	23	25	26	23	23	28	24	26	26	18	23	28	23	29	46	46	46	30	16	16	18			7	0.217182	0.012965	0.0312577	0.0377886	0.150874	0.183759	0.20412	0.147547	0.147547	0.226396	0.15945	0.197489	0.197489	0.0410912	0.109482	0.157123	0.0772971	0.251545	0.451904
	8		34	45	45	45	36	37	37	50	50	35	40	36	36	46	61	52	55	54	25	25	25	31	5	5	7			8	0.317298	0.435729	0.429198	0.435729	0.345449	0.35402	0.357348	0.484789	0.484789	0.323306	0.381298	0.338819	0.338819	0.448577	0.533084	0.425969	0.455932	0.52154	0.187087
		Total number of genes	131	132	134	132	130	131	130	131	131	133	133	132	132	131	143	156	154	130	130	130	130	119	170	171	168
	1		68	55	43	53	56	43	52	58	33	60	61	64	64	55	37	45	48	47	107	107	105	28	125	114	107		Shell	1	0.04629	-0.0323257	-0.073036	-0.0131156	0.0591013	-0.0136699	0.03703	-0.0245635	-0.199572	0.0387767	0.0342433	0.0589624	0.0599351	0.0602539	-0.0665274	-0.0596476	0.0184834	-0.0147618	-0.0193493
	2		51	57	61	61	40	38	37	60	63	66	65	66	66	42	39	51	40	36	133	133	133	26	121	132	109			2	-0.0786487	-0.0168135	0.0788254	0.0479384	-0.0870268	-0.0673548	-0.110772	-0.00984025	0.0812543	0.0801694	0.0618268	0.0723264	0.0732991	-0.0568595	-0.0436645	-0.00528989	-0.0606978	-0.130557	0.0751186
	3		77	79	52	58	46	36	47	75	51	66	55	46	46	48	56	46	51	57	122	123	123	36	134	124	108			3	0.100272	0.124939	0.00949892	0.0260365	-0.0263289	-0.0908359	-0.00687552	0.0870698	-0.0105161	0.0801694	-0.0107239	-0.0844597	-0.083487	0.00113245	0.113459	-0.0501022	0.0448123	0.0690152	0.0376268
	4		70	63	50	60	38	63	44	71	53	61	63	54	54	68	40	53	42	47	134	133	132	28	73	76	114			4	0.0588792	0.0266522	-0.00753442	0.0407598	-0.109303	0.152202	-0.0355207	0.0632668	0.00618957	0.0459553	0.048254	-0.0148238	-0.0138511	0.1524	-0.0326691	0.0114158	-0.0395085	-0.0147618	0.0783718
	5		53	50	42	52	54	41	53	63	54	35	42	54	54	29	47	61	51	44	106	108	111	27	105	125	73			5	-0.061943	-0.0737184	-0.0832551	-0.0213881	0.043307	-0.0343545	0.0453025	0.011349	0.0143075	-0.195306	-0.127837	-0.0148238	-0.0138511	-0.217711	0.0373687	0.0724698	0.0448123	-0.0434069	-0.0234272
	6		59	53	46	51	49	57	54	68	46	61	57	57	57	50	52	49	40	50	98	97	97	29	120	113	141			6	-0.0153669	-0.0484125	-0.0437466	-0.0298213	0.00110931	0.108736	0.0534204	0.0445174	-0.0553285	0.0459553	0.0047883	0.00865732	0.00962998	0.0188612	0.0812742	-0.022664	-0.0606978	0.0121104	-0.057507
	7		66	70	57	53	50	33	50	51	67	47	56	54	54	49	45	60	49	57	93	93	93	23	92	82	116			7	0.0333251	0.0724097	0.0493704	-0.0131156	0.00988323	-0.128624	0.0199966	-0.0804213	0.107989	-0.0672767	-0.00289853	-0.0148238	-0.0138511	0.0100873	0.0184834	0.0652912	0.0274382	0.0690152	-0.0802501
	8		45	47	56	49	58	44	45	45	51	43	52	52	51	42	29	48	47	51	102	102	102	33	128	125	109			8	-0.133006	-0.10059	0.0416836	-0.0471954	0.0743412	-0.00368569	-0.0257609	-0.134779	-0.0105161	-0.105906	-0.0350832	-0.0312142	-0.0386747	-0.0568595	-0.172331	-0.0316188	0.00934003	0.0207106	-0.0401329
		Total number of genes	489	474	407	437	391	355	382	491	418	439	451	447	446	383	345	413	368	389	895	896	896	230	898	891	877
Cloud	1		21	30	26	14	7	10	17	34	44	5	6	3	3	12	39	64	60	63	2	2	4	42	37	48	56		Cloud	1	-0.0299632	0.0684574	0.100579	-0.0843209	-0.401031	0.09691	0.108233	0.235912	0.323826	-0.09691	-0.0347621	-0.383217	-0.383217	-0.190915	-0.0867704	0.0244246	-0.0591215	-0.0218453	-0.210853
	2		33	31	28	24	29	10	35	22	23	8	7	6	6	31	52	81	93	97	4	4	4	68	47	56	59			2	0.166331	0.0826978	0.132764	0.149762	0.216269	0.09691	0.421852	0.0468556	0.0421014	0.10721	0.0321847	-0.0821868	-0.0821868	0.221265	0.0381684	0.12673	0.13121	0.165586	0.0901766
	3		19	17	14	19	30	13	4	20	16	2	13	22	22	20	41	81	74	76	3	2	2	62	29	59	64			3	-0.0734289	-0.178215	-0.168266	0.0483047	0.230992	0.210853	-0.520156	0.0054629	-0.115507	-0.49485	0.30103	0.482085	0.482085	0.0309337	-0.0650511	0.12673	0.031959	0.0596277	-0.0347621
	4		30	35	26	15	39	12	12	26	26	15	15	6	6	10	52	83	94	81	4	5	6	48	59	72	50			4	0.124939	0.135404	0.100579	-0.0543577	0.344935	0.176091	-0.0430346	0.119406	0.0953469	0.380211	0.363178	-0.0821868	-0.0821868	-0.270096	0.0381684	0.137323	0.135855	0.0872991	0.0901766
	5		35	37	24	12	9	2	11	25	22	9	7	10	10	45	67	48	59	74	7	5	2	54	36	38	39			5	0.191886	0.159538	0.0658173	-0.151268	-0.291887	-0.60206	-0.0808232	0.102373	0.0227962	0.158362	0.0321847	0.139662	0.139662	0.383116	0.14824	-0.100514	-0.0664207	0.0480458	0.333215
	6		14	23	14	12	12	5	7	9	11	2	0	2	2	3	59	42	52	61	1	2	2	54	45	73	37			6	-0.206054	-0.046936	-0.168266	-0.151268	-0.166948	-0.20412	-0.277118	-0.341325	-0.278234	-0.49485	#NUM!	-0.559308	-0.559308	-0.792975	0.093017	-0.158506	-0.121269	-0.035856	-0.511883
	7		7	13	25	29	7	2	4	11	10	5	0	0	0	13	52	52	68	54	1	1	1	47	72	82	66			7	-0.507084	-0.294721	0.0835461	0.231949	-0.401031	-0.60206	-0.520156	-0.254174	-0.319626	-0.09691	#NUM!	#NUM!	#NUM!	-0.156153	0.0381684	-0.065752	-0.00476379	-0.0887921	-0.511883
	8		21	19	8	11	8	10	16	11	15	4	4	9	9	15	19	33	50	24	4	8	8	47	53	77	74			8	-0.0299632	-0.12991	-0.411304	-0.189056	-0.343039	0.09691	0.0819041	-0.254174	-0.143535	-0.19382	-0.210853	0.0939045	0.0939045	-0.094005	-0.399081	-0.263241	-0.138303	-0.440975	0.0901766
		Total number of genes	180	205	165	136	141	64	106	158	167	50	52	58	58	149	381	484	550	530	26	29	29	422	378	505	445
10 sectors																													10 sectors
Pangene category	Sectors		P. fuliginea Bsw20308	P. sp. 1_2015MBL_MicDiv	P. aliena EH1	P. arctica A 37-1-2	P. translucida KMM 520	P. translucida TAC125	P. nigrifaciens KMM 661	P. agarivorans DSM 14585	P. espejiana DSM 9414 ATCC 29659	P. sp. SM9913	P. tetraodonis GFC	P. issachenkonii KMM 3549	P. issachenkonii KCTC 12958	P. sp. 13-15	P. phenolica KCTC 12086	P. sp. NC201	P. piscicida DE2-B	P. rubra SCSIO 6842	P. luteoviolacea S4054	P. luteoviolacea S4054249	P. luteoviolacea S40542	P. tunicata D2	P. spongiae UST010723-006	P. spongiae SAO4-4	P. piratica OCN003		Pangene category	Sectors	P. fuliginea Bsw20308	P. sp. 1_2015MBL_MicDiv	P. aliena EH1	P. arctica A 37-1-2	P. translucida KMM 520	P. translucida TAC125	P. nigrifaciens KMM 661	P. agarivorans DSM 14585	P. espejiana DSM 9414 ATCC 29659	P. sp. SM9913	P. tetraodonis GFC	P. issachenkonii KMM 3549	P. issachenkonii KCTC 12958	P. sp. 13-15	P. phenolica KCTC 12086	P. sp. NC201	P. piscicida DE2-B	P. rubra SCSIO 6842	P. luteoviolacea S4054
Core	1		9	10	5	9	10	6	6	3	2	9	6	6	6	7	15	8	9	8	8	8	8	8	15	15	14		Core	1	-0.0751413	-0.0293838	-0.334454	-0.0710634	-0.0293838	-0.243038	-0.243038	-0.548185	-0.724276	-0.0710634	-0.247155	-0.247155	-0.247155	-0.184286	0.111633	-0.2075	-0.156347	-0.130334	-0.126294
	2		6	5	11	6	5	9	8	12	7	7	10	9	9	9	14	5	6	3	3	3	3	6	3	3	5			2	-0.251233	-0.330414	0.00796893	-0.247155	-0.330414	-0.0669468	-0.118099	0.0538754	-0.180208	-0.180208	-0.0253059	-0.0710634	-0.0710634	-0.0751413	0.08167	-0.41162	-0.332438	-0.556303	-0.552263
	3		9	9	6	9	7	9	6	9	6	9	7	1	1	8	2	7	7	0	7	6	5	1	3	4	1			3	-0.0751413	-0.0751413	-0.255273	-0.0710634	-0.184286	-0.0669468	-0.243038	-0.0710634	-0.247155	-0.0710634	-0.180208	-1.02531	-1.02531	-0.126294	-0.763428	-0.265492	-0.265492	#NUM!	-0.184286
	4		0	0	4	1	3	1	4	0	9	0	2	8	8	2	1	8	7	12	6	7	8	3	14	14	6			4	#NUM!	#NUM!	-0.431364	-1.02531	-0.552263	-1.02119	-0.419129	#NUM!	-0.0710634	#NUM!	-0.724276	-0.122216	-0.122216	-0.728354	-1.06446	-0.2075	-0.265492	0.0457575	-0.251233
	5		0	1	3	3	2	6	2	1	1	3	1	1	1	3	7	1	0	5	1	1	1	4	38	50	17			5	#NUM!	-1.02938	-0.556303	-0.548185	-0.728354	-0.243038	-0.720159	-1.02531	-1.02531	-0.548185	-1.02531	-1.02531	-1.02531	-0.552263	-0.21936	-1.11059	#NUM!	-0.334454	-1.02938
	6		4	5	13	15	15	16	14	4	3	15	3	4	4	3	1	7	7	2	6	6	6	13	31	20	50			6	-0.427324	-0.330414	0.0805196	0.150785	0.146707	0.182931	0.124939	-0.423246	-0.548185	0.150785	-0.548185	-0.423246	-0.423246	-0.552263	-1.06446	-0.265492	-0.265492	-0.732394	-0.251233
	7		26	24	15	12	15	7	13	17	20	12	19	25	25	23	7	16	23	4	1	1	1	6	5	6	18			7	0.38559	0.350827	0.142668	0.0538754	0.146707	-0.176091	0.0927541	0.205143	0.275724	0.0538754	0.253448	0.372634	0.372634	0.332344	-0.21936	0.0935303	0.251138	-0.431364	-1.02938
	8		4	4	6	6	7	8	7	10	9	6	13	7	7	7	4	12	5	2	31	31	31	12	12	9	3			8	-0.427324	-0.427324	-0.255273	-0.247155	-0.184286	-0.118099	-0.176091	-0.0253059	-0.0710634	-0.247155	0.0886375	-0.180208	-0.180208	-0.184286	-0.462398	-0.0314085	-0.41162	-0.732394	0.461978
	9		27	20	16	16	26	28	18	21	17	23	18	18	18	25	15	21	21	25	25	25	25	36	7	7	12			9	0.40198	0.271646	0.170696	0.178814	0.38559	0.425969	0.234083	0.296913	0.205143	0.336422	0.229967	0.229967	0.229967	0.368556	0.111633	0.21163	0.21163	0.364516	0.368556
	10		22	29	29	29	17	15	27	29	32	22	27	27	27	20	50	44	44	47	19	19	18	11	3	3	5			10	0.313039	0.433014	0.428974	0.437092	0.201065	0.154902	0.410174	0.437092	0.479844	0.317117	0.406058	0.406058	0.406058	0.271646	0.634512	0.532863	0.532863	0.638674	0.24937
		Total number of genes number of genes	107	107	108	106	107	105	105	106	106	106	106	106	106	107	116	129	129	108	107	107	106	100	131	131	131
																													Softcore
Softcore	1		10	11	7	10	11	7	7	4	3	11	8	8	8	8	17	10	11	10	11	11	11	10	17	18	17			1	-0.117271	-0.0791812	-0.282007	-0.120574	-0.0725507	-0.272173	-0.268845	-0.518514	-0.64015	-0.082459	-0.220762	-0.217484	-0.217484	-0.214181	0.0751129	-0.193125	-0.146128	-0.113943	-0.0725507
	2		9	8	13	9	9	12	10	14	7	9	12	11	11	10	16	6	8	6	3	3	3	6	10	10	10			2	-0.163029	-0.217484	-0.0131614	-0.166331	-0.159701	-0.03809	-0.113943	0.0255541	-0.272173	-0.169609	-0.0446704	-0.0791812	-0.0791812	-0.117271	0.0487839	-0.414973	-0.284431	-0.335792	-0.636822
	3		11	12	7	12	8	11	7	13	8	13	8	2	2	10	2	8	8	1	7	6	5	1	4	4	5			3	-0.0758786	-0.0413927	-0.282007	-0.0413927	-0.210853	-0.0758786	-0.268845	-0.00663058	-0.214181	-0.00990829	-0.220762	-0.819544	-0.819544	-0.117271	-0.854306	-0.290035	-0.284431	-1.11394	-0.268845
	4		1	0	6	1	5	2	7	0	12	0	5	10	10	4	2	10	8	12	8	9	10	5	19	19	7			4	-1.11727	#NUM!	-0.348954	-1.12057	-0.414973	-0.816241	-0.268845	#NUM!	-0.03809	#NUM!	-0.424882	-0.120574	-0.120574	-0.515211	-0.854306	-0.193125	-0.284431	-0.0347621	-0.210853
	5		0	2	4	4	3	7	3	1	1	4	2	2	2	4	7	2	1	7	1	1	1	4	45	59	21			5	#NUM!	-0.819544	-0.525045	-0.518514	-0.636822	-0.272173	-0.636822	-1.12057	-1.11727	-0.521792	-0.822822	-0.819544	-0.819544	-0.515211	-0.310238	-0.892095	-1.18752	-0.268845	-1.11394
	6		5	5	14	16	16	19	14	5	4	16	3	5	5	4	4	8	7	2	7	7	7	15	37	25	58			6	-0.418301	-0.421604	0.0190232	0.0835461	0.0901766	0.161482	0.0321847	-0.421604	-0.515211	0.0802683	-0.64673	-0.421604	-0.421604	-0.515211	-0.553276	-0.290035	-0.342423	-0.812913	-0.268845
	7		30	28	20	17	19	10	17	20	23	16	22	30	30	27	9	20	29	7	2	2	2	8	7	11	23			7	0.35985	0.326584	0.173925	0.109875	0.16481	-0.117271	0.116506	0.180456	0.244457	0.0802683	0.218571	0.356547	0.356547	0.314092	-0.201094	0.107905	0.274877	-0.268845	-0.812913
	8		7	6	9	8	11	13	11	13	13	10	18	11	11	11	5	14	6	2	37	36	36	12	16	10	4			8	-0.272173	-0.342423	-0.172862	-0.217484	-0.0725507	-0.00332794	-0.0725507	-0.00663058	-0.00332794	-0.123852	0.131421	-0.0791812	-0.0791812	-0.0758786	-0.456366	-0.0469966	-0.409369	-0.812913	0.454258
	9		32	26	19	20	28	32	21	27	21	27	22	21	21	29	20	26	25	29	29	30	30	44	10	10	16			9	0.387879	0.294399	0.151649	0.180456	0.333215	0.387879	0.208276	0.31079	0.204948	0.307512	0.218571	0.201645	0.201645	0.345127	0.145694	0.221849	0.210419	0.348455	0.348455
	10		26	34	35	35	20	18	33	35	39	27	33	32	32	24	61	52	51	54	25	25	25	14	5	5	7			10	0.297702	0.410905	0.416963	0.423494	0.187087	0.138001	0.404571	0.423494	0.473793	0.307512	0.394662	0.384576	0.384576	0.26294	0.629994	0.522879	0.520049	0.61845	0.283997
		Total number of genes number of genes	131	132	134	132	130	131	130	132	131	133	133	132	132	131	143	156	154	130	130	130	130	119	170	171	168
																													Shell
Shell	1		53	43	29	37	45	43	39	43	22	45	47	49	49	40	28	43	42	35	87	87	86	28	98	108	73			1	0.034967	-0.0423099	-0.147196	-0.0722797	0.0610358	0.0832401	0.00900124	-0.057613	-0.278754	0.010748	0.0179213	0.0398886	0.0408612	0.0188612	-0.0906611	0.0175184	0.0574015	-0.0458816	-0.0123038
	2		48	47	56	56	41	38	33	50	54	44	43	26	26	31	26	36	40	31	116	116	115	21	100	100	88			2	-0.00806762	-0.00368048	0.138594	0.107707	0.0206071	0.0295552	-0.0635494	0.00788851	0.111217	0.000988156	-0.0207081	-0.235334	-0.234362	-0.0918371	-0.122846	-0.0596476	0.0362122	-0.0985879	0.112635
	3		42	52	30	34	24	36	31	51	32	64	46	55	55	50	46	34	29	41	90	91	92	28	98	111	101			3	-0.0660596	0.040225	-0.132473	-0.109003	-0.211966	0.00607415	-0.0907017	0.0164887	-0.116026	0.163715	0.00858129	0.0900552	0.0910278	0.115771	0.124939	-0.0844711	-0.10345	0.0228343	0.00241947
	4		68	61	59	57	49	31	45	49	58	57	45	29	29	61	38	38	30	36	89	88	87	21	95	76	79			4	0.1432	0.109551	0.161258	0.115393	0.0980193	-0.0588667	0.0711492	-0.000885412	0.142252	0.11341	-0.000964028	-0.18791	-0.186937	0.202131	0.0419645	-0.0361665	-0.0887266	-0.0336471	-0.00243303
	5		55	51	32	48	40	48	42	57	34	43	49	56	56	44	34	36	35	33	97	97	97	28	62	59	108			5	0.0510538	0.0317918	-0.104444	0.0407598	0.00988323	0.131013	0.0411859	0.0647934	-0.0896974	-0.00899606	0.0360195	0.0978805	0.0988532	0.0602539	-0.00634018	-0.0596476	-0.0217798	-0.0714357	0.0349487
	6		42	39	42	52	35	37	43	51	54	35	46	60	60	16	34	49	37	43	86	88	89	19	76	81	50			6	-0.0660596	-0.0847137	0.0136549	0.0755219	-0.0481087	0.0179734	0.0514051	0.0164887	0.111217	-0.0983965	0.00858129	0.127844	0.128816	-0.379079	-0.00634018	0.074246	0.00235391	0.0435189	-0.0173246
	7		41	43	46	51	49	26	41	52	46	42	36	49	49	50	30	47	50	42	95	94	95	17	98	97	97			7	-0.076525	-0.0423099	0.0531634	0.0670887	0.0980193	-0.135255	0.0307205	0.0249219	0.0415815	-0.0192152	-0.097874	0.0398886	0.0408612	0.115771	-0.0606978	0.0561478	0.133122	0.0332997	0.0259006
	8		64	57	43	29	42	45	41	59	44	49	62	48	48	41	43	43	35	31	63	64	64	18	95	85	116			8	0.116871	0.0800965	0.023874	-0.178083	0.0310725	0.102984	0.0307205	0.0797705	0.0222764	0.0477316	0.138215	0.0309337	0.0319064	0.0295851	0.0956494	0.0175184	-0.0217798	-0.0985879	-0.152482
	9		38	39	23	32	28	23	32	41	32	29	36	35	35	21	37	39	30	46	70	69	69	17	74	77	65			9	-0.109525	-0.0847137	-0.247867	-0.135331	-0.145019	-0.188501	-0.0769134	-0.0782976	-0.116026	-0.180067	-0.097874	-0.106239	-0.105267	-0.260979	0.0303826	-0.0248854	-0.0887266	0.0728082	-0.106725
	10		38	42	47	41	38	28	35	38	42	31	41	40	39	29	29	48	40	51	102	102	102	33	102	97	100			10	-0.109525	-0.0525291	0.0625034	-0.0276976	-0.0123932	-0.10307	-0.0379953	-0.111298	0.00207301	-0.151103	-0.0413927	-0.0482475	-0.0582703	-0.120801	-0.0754211	0.0652912	0.0362122	0.117621	0.0567771
		Total number of genes	489	474	407	437	391	355	382	491	418	439	451	447	446	383	345	413	368	389	895	896	896	230	898	891	877
																													Cloud
Cloud	1		17	26	24	13	4	10	14	33	35	4	5	3	3	12	35	47	47	55	2	2	3	42	25	34	50			1	-0.0248236	0.103219	0.162727	-0.0195956	-0.547159	0.19382	0.120822	0.319857	0.321352	-0.09691	-0.0170333	-0.286307	-0.286307	-0.094005	-0.0368569	-0.0127475	-0.0682648	0.0160868	-0.113943
	2		23	25	11	15	10	10	17	16	19	7	5	3	3	19	38	78	72	83	1	1	2	53	30	50	42			2	0.106455	0.0861861	-0.176091	0.0425524	-0.149219	0.19382	0.205143	0.0054629	0.0560371	0.146128	-0.0170333	-0.286307	-0.286307	0.105567	-0.00114138	0.207249	0.11697	0.194802	-0.414973
	3		27	16	23	14	48	13	22	16	20	3	6	3	3	20	32	58	63	58	3	3	3	51	38	45	54			3	0.176091	-0.107634	0.144244	0.0125891	0.532022	0.307763	0.317117	0.0054629	0.0783135	-0.221849	0.0621479	-0.286307	-0.286307	0.127844	-0.075775	0.0785826	0.0589779	0.0391521	0.0621479
	4		11	19	12	22	26	7	8	11	10	3	10	21	21	15	40	52	62	52	3	3	3	54	26	65	54			4	-0.21388	-0.0330003	-0.138303	0.208884	0.265754	0.0389181	-0.122216	-0.157264	-0.222716	-0.221849	0.283997	0.558791	0.558791	0.00290499	0.021135	0.031158	0.052029	-0.00827253	0.0621479
	5		25	27	24	8	17	5	15	22	25	13	9	2	2	12	39	62	64	60	2	2	2	28	53	42	31			5	0.142668	0.11961	0.162727	-0.230449	0.0812298	-0.10721	0.150785	0.143766	0.175224	0.414973	0.238239	-0.462398	-0.462398	-0.094005	0.0101396	0.107546	0.0658173	0.0538754	-0.113943
	6		33	36	24	12	9	3	3	24	22	9	11	15	15	40	42	43	56	55	7	5	4	46	27	34	32			6	0.263241	0.244549	0.162727	-0.0543577	-0.194977	-0.329059	-0.548185	0.181554	0.119706	0.255273	0.325389	0.412663	0.412663	0.428874	0.0423243	-0.0513769	0.00782534	0.0160868	0.430125
	7		9	9	14	12	12	4	2	8	11	2	2	1	1	3	41	33	41	51	3	4	3	35	35	32	20			7	-0.30103	-0.357511	-0.0713559	-0.0543577	-0.0700379	-0.20412	-0.724276	-0.295567	-0.181324	-0.39794	-0.414973	-0.763428	-0.763428	-0.696065	0.0318589	-0.166331	-0.127579	-0.0167057	0.0621479
	8		9	17	8	23	7	2	8	8	3	1	0	1	1	8	52	43	59	67	0	0	0	50	49	65	40			8	-0.30103	-0.0813049	-0.314394	0.228189	-0.304121	-0.50515	-0.122216	-0.295567	-0.745595	-0.69897	#NUM!	-0.763428	-0.763428	-0.270096	0.135078	-0.0513769	0.0304893	0.101799	#NUM!
	9		10	15	18	8	4	5	7	12	7	4	2	4	4	10	43	35	45	25	1	1	1	19	56	73	59			9	-0.255273	-0.135663	0.0377886	-0.230449	-0.547159	-0.10721	-0.180208	-0.119476	-0.377618	-0.09691	-0.414973	-0.161368	-0.161368	-0.173186	0.0525435	-0.140777	-0.0871502	-0.326336	-0.414973
	10		16	15	7	9	4	5	10	8	15	4	2	5	5	10	19	33	41	24	4	8	8	44	39	65	63			10	-0.0511525	-0.135663	-0.372386	-0.179296	-0.547159	-0.10721	-0.0253059	-0.295567	-0.0466252	-0.09691	-0.414973	-0.064458	-0.064458	-0.173186	-0.302171	-0.166331	-0.127579	-0.344065	0.187087
		Total number of genes	180	205	165	136	141	64	106	158	167	50	52	58	58	149	381	484	550	530	26	29	29	422	378	505	445
			800	811	706	705	662	550	618	781	716	622	636	637	636	663	869	1053	1072	1049	1051	1055	1055	771	1446	1567	1490
12 sectors																													12 Sectors
Pangene category	Sectors		P. fuliginea Bsw20308	P. sp. 1_2015MBL_MicDiv	P. aliena EH1	P. arctica A 37-1-2	P. translucida KMM 520	P. translucida TAC125	P. nigrifaciens KMM 661	P. agarivorans DSM 14585	P. espejiana DSM 9414 ATCC 29659	P. sp. SM9913	P. tetraodonis GFC	P. issachenkonii KMM 3549	P. issachenkonii KCTC 12958	P. sp. 13-15	P. phenolica KCTC 12086	P. sp. NC201	P. piscicida DE2-B	P. rubra SCSIO 6842	P. luteoviolacea S4054	P. luteoviolacea S4054249	P. luteoviolacea S40542	P. tunicata D2	P. spongiae UST010723-006	P. spongiae SAO4-4	P. piratica OCN003		Pangene category	Sectors	P. fuliginea Bsw20308	P. sp. 1_2015MBL_MicDiv	P. aliena EH1	P. arctica A 37-1-2	P. translucida KMM 520	P. translucida TAC125	P. nigrifaciens KMM 661	P. agarivorans DSM 14585	P. espejiana DSM 9414 ATCC 29659	P. sp. SM9913	P. tetraodonis GFC	P. issachenkonii KMM 3549	P. issachenkonii KCTC 12958	P. sp. 13-15	P. phenolica KCTC 12086	P. sp. NC201	P. piscicida DE2-B	P. rubra SCSIO 6842	P. luteoviolacea S4054
Core	1		6	9	5	9	10	6	6	2	2	9	6	4	4	7	15	8	8	7	8	8	8	7	13	15	5		Core	1	-0.171878	0.00421373	-0.255099	0.00829164	0.0499712	-0.163683	-0.163683	-0.644921	-0.644921	0.00829164	-0.1678	-0.343891	-0.343891	-0.104931	0.190988	-0.128145	-0.128145	-0.108971	-0.0469388
	2		8	5	11	6	5	9	8	12	2	6	9	7	7	9	14	2	3	2	0	0	0	2	5	3	13			2	-0.0469388	-0.251059	0.0873239	-0.1678	-0.251059	0.0124082	-0.0387443	0.13323	-0.644921	-0.1678	0.00829164	-0.100853	-0.100853	0.00421373	0.161025	-0.730205	-0.554113	-0.653039	#NUM!
	3		8	8	1	7	7	7	6	1	11	1	1	5	5	1	0	5	4	2	3	3	3	5	2	2	2			3	-0.0469388	-0.0469388	-0.954069	-0.100853	-0.104931	-0.0967363	-0.163683	-0.945951	0.0954418	-0.945951	-0.945951	-0.246981	-0.246981	-0.950029	#NUM!	-0.332265	-0.429175	-0.653039	-0.472908
	4		2	2	9	2	2	2	4	9	7	9	7	7	7	9	2	5	7	0	7	6	5	1	3	3	3			4	-0.648999	-0.648999	0.000173753	-0.644921	-0.648999	-0.640804	-0.339774	0.00829164	-0.100853	0.00829164	-0.100853	-0.100853	-0.100853	0.00421373	-0.684073	-0.332265	-0.186137	#NUM!	-0.104931
	5		0	0	0	2	1	2	1	0	3	0	2	2	2	0	7	7	7	7	6	7	8	3	13	13	3			5	#NUM!	#NUM!	#NUM!	-0.644921	-0.950029	-0.640804	-0.941834	#NUM!	-0.46883	#NUM!	-0.644921	-0.644921	-0.644921	#NUM!	-0.140005	-0.186137	-0.186137	-0.108971	-0.171878
	6		0	0	3	3	2	5	3	1	0	1	1	1	1	3	1	2	0	10	0	0	0	5	37	31	17			6	#NUM!	#NUM!	-0.476948	-0.46883	-0.648999	-0.242864	-0.464713	-0.945951	#NUM!	-0.945951	-0.945951	-0.945951	-0.945951	-0.472908	-0.985103	-0.730205	#NUM!	0.0459312	#NUM!
	7		1	1	13	14	15	11	12	3	3	9	3	3	3	3	1	6	6	1	4	4	4	12	29	37	47			7	-0.950029	-0.950029	0.159875	0.200177	0.226062	0.0995584	0.137347	-0.46883	-0.46883	0.00829164	-0.46883	-0.46883	-0.46883	-0.472908	-0.985103	-0.253083	-0.253083	-0.954069	-0.347969
	8		9	12	14	12	13	11	8	9	15	18	19	20	20	20	7	3	7	1	3	3	3	6	5	3	19			8	0.00421373	0.129152	0.192059	0.13323	0.163915	0.0995584	-0.0387443	0.00829164	0.23014	0.309322	0.332803	0.355079	0.355079	0.351001	-0.140005	-0.554113	-0.186137	-0.954069	-0.472908
	9		20	17	2	1	3	2	7	18	11	2	7	6	6	4	2	22	20	6	5	5	5	11	9	9	3			9	0.351001	0.28042	-0.653039	-0.945951	-0.472908	-0.640804	-0.0967363	0.309322	0.0954418	-0.644921	-0.100853	-0.1678	-0.1678	-0.347969	-0.684073	0.311188	0.269795	-0.175918	-0.251059
	10		4	4	6	6	17	7	7	3	7	14	8	8	8	11	5	6	6	1	30	30	30	13	5	9	9			10	-0.347969	-0.347969	-0.175918	-0.1678	0.28042	-0.0967363	-0.0967363	-0.46883	-0.100853	0.200177	-0.0428609	-0.0428609	-0.0428609	0.0913639	-0.286133	-0.253083	-0.253083	-0.954069	0.527092
	11		27	20	27	22	20	16	27	19	23	27	26	16	16	30	20	24	23	30	22	22	24	25	7	3	8			11	0.481335	0.351001	0.477295	0.396472	0.351001	0.262286	0.489529	0.332803	0.415777	0.485413	0.469022	0.258169	0.258169	0.527092	0.315927	0.348977	0.330493	0.523052	0.392394
	12		22	29	17	22	12	27	16	29	22	10	17	27	27	10	42	39	38	41	19	19	16	10	3	3	2			12	0.392394	0.512369	0.27638	0.396472	0.129152	0.489529	0.262286	0.516447	0.396472	0.0540491	0.284498	0.485413	0.485413	0.0499712	0.638146	0.55983	0.548549	0.658715	0.328725
		Total number of genes	107	107	108	106	107	105	105	106	106	106	106	106	106	107	116	129	129	108	107	107	106	100	131	131	131
Softcore	1		7	10	7	10	11	7	7	3	3	11	8	6	6	8	17	9	9	9	11	11	11	9	14	17	8		Softcore	1	-0.192818	-0.0412189	-0.202652	-0.0412189	0.00680433	-0.192818	-0.18949	-0.564098	-0.560795	-0.00310396	-0.141407	-0.263068	-0.263068	-0.134826	0.154468	-0.159527	-0.153923	-0.0803458	0.00680433
	2		10	7	13	8	9	12	10	13	2	8	11	7	7	10	16	4	5	3	0	0	0	2	11	8	17			2	-0.0379163	-0.196121	0.0661936	-0.138129	-0.0803458	0.0412649	-0.0345884	0.0727244	-0.736886	-0.141407	-0.00310396	-0.196121	-0.196121	-0.0379163	0.128139	-0.51171	-0.409196	-0.557467	#NUM!
	3		10	10	2	10	8	8	7	3	12	2	2	7	7	2	0	6	5	4	3	3	3	5	5	5	5			3	-0.0379163	-0.0412189	-0.74672	-0.0412189	-0.131498	-0.134826	-0.18949	-0.564098	0.0412649	-0.743467	-0.743467	-0.196121	-0.196121	-0.736886	#NUM!	-0.335618	-0.409196	-0.432528	-0.557467
	4		4	4	11	3	4	4	7	12	10	12	9	9	9	12	3	5	8	1	6	6	5	1	6	6	5			4	-0.435856	-0.439159	-0.00635711	-0.564098	-0.432528	-0.435856	-0.18949	0.0379623	-0.0379163	0.0346846	-0.0902541	-0.0869764	-0.0869764	0.0412649	-0.59886	-0.4148	-0.205076	-1.03459	-0.256437
	5		0	0	0	2	1	3	1	0	4	0	3	4	4	0	7	8	8	7	9	9	10	5	15	15	4			5	#NUM!	#NUM!	#NUM!	-0.740189	-1.03459	-0.560795	-1.03459	#NUM!	-0.435856	#NUM!	-0.567375	-0.439159	-0.439159	#NUM!	-0.230883	-0.21068	-0.205076	-0.18949	-0.0803458
	6		0	0	4	4	3	5	4	1	0	2	2	2	2	4	1	3	1	11	0	0	0	5	44	38	21			6	#NUM!	#NUM!	-0.44569	-0.439159	-0.557467	-0.338946	-0.432528	-1.04122	#NUM!	-0.743467	-0.743467	-0.740189	-0.740189	-0.435856	-1.07598	-0.636648	-1.10817	0.00680433	#NUM!
	7		2	2	14	15	16	12	12	4	4	10	3	3	3	4	4	7	6	2	4	4	4	14	34	44	55			7	-0.736886	-0.740189	0.0983782	0.134872	0.169532	0.0412649	0.0445929	-0.439159	-0.435856	-0.0444966	-0.567375	-0.564098	-0.564098	-0.435856	-0.473921	-0.268672	-0.330014	-0.733558	-0.432528
	8		10	13	18	16	16	15	11	10	17	22	22	23	23	23	9	5	9	1	5	5	5	8	7	5	21			8	-0.0379163	0.0727244	0.207523	0.162901	0.169532	0.138175	0.00680433	-0.0412189	0.192533	0.297926	0.297926	0.320509	0.320509	0.323812	-0.121739	-0.4148	-0.153923	-1.03459	-0.335618
	9		23	20	3	2	4	3	9	22	14	3	9	9	9	6	2	26	25	9	5	5	5	11	13	12	7			9	0.323812	0.259811	-0.570629	-0.740189	-0.432528	-0.560795	-0.0803458	0.301204	0.108212	-0.567375	-0.0902541	-0.0869764	-0.0869764	-0.259765	-0.774951	0.301204	0.289774	-0.0803458	-0.335618
	10		7	6	10	10	22	12	12	6	11	19	14	13	13	16	9	7	6	1	38	38	38	16	6	11	12			10	-0.192818	-0.263068	-0.0477498	-0.0412189	0.307834	0.0412649	0.0445929	-0.263068	0.00347639	0.234257	0.101631	0.0727244	0.0727244	0.166204	-0.121739	-0.268672	-0.330014	-1.03459	0.545195
	11		32	26	30	25	22	17	30	23	27	32	28	17	17	34	25	31	29	35	24	24	26	31	10	5	11			11	0.467234	0.373754	0.429371	0.356721	0.307834	0.192533	0.442533	0.320509	0.393447	0.460653	0.402661	0.18923	0.18923	0.493563	0.321959	0.377592	0.354232	0.50948	0.345623
	12		26	34	22	27	14	33	20	35	27	12	22	32	32	12	50	45	43	47	25	25	23	12	5	5	2			12	0.377057	0.49026	0.294673	0.390145	0.11154	0.480598	0.266442	0.502849	0.393447	0.0346846	0.297926	0.463931	0.463931	0.0412649	0.622989	0.539443	0.525303	0.63751	0.363352
		Total number of genes	131	132	134	132	130	131	130	132	131	133	133	132	132	131	143	156	154	130	130	130	130	119	170	171	168
Shell	1		43	36	29	37	45	43	39	24	22	45	47	31	31	40	28	39	37	30	68	68	66	20	83	92	63		Shell	1	0.0235146	-0.0401208	-0.0678414	0.00707529	0.140391	0.162595	0.0883562	-0.231515	-0.199399	0.090103	0.0972763	-0.0795908	-0.0786182	0.0982162	-0.0113061	0.0544696	0.0817089	-0.0334733	-0.0399591
	2		35	29	41	40	41	38	33	43	40	28	27	33	33	31	26	21	27	24	78	78	78	20	80	81	90			2	-0.0658858	-0.134025	0.0825444	0.0409336	0.0999621	0.10891	0.0158056	0.021742	0.0602387	-0.115951	-0.143458	-0.0524386	-0.0514659	-0.0124821	-0.0434907	-0.214376	-0.0551291	-0.130383	0.0196266
	3		41	47	34	37	15	19	31	42	34	53	52	47	47	41	31	28	18	17	75	75	75	14	83	73	78			3	0.00283	0.0756745	0.00123951	0.00707529	-0.33673	-0.19212	-0.0113467	0.0115228	-0.0103424	0.161166	0.141182	0.101145	0.102118	0.10894	0.0328976	-0.089437	-0.23122	-0.280146	0.00259323
	4		42	47	33	41	41	34	45	35	37	27	20	37	37	33	47	25	29	36	72	73	74	29	96	93	64			4	0.0132954	0.0756745	-0.0117255	0.0516574	0.0999621	0.0606056	0.150504	-0.0676584	0.0263804	-0.131746	-0.273792	-0.0027508	-0.00177814	0.0146702	0.213634	-0.138655	-0.0240948	0.0457079	-0.0151355
	5		50	44	44	47	22	30	32	49	38	57	53	47	47	53	25	29	30	33	69	69	68	25	65	56	83			5	0.0890161	0.0470293	0.113213	0.110971	-0.170399	0.0062479	0.00244161	0.0784696	0.0379623	0.192765	0.149454	0.101145	0.102118	0.220432	-0.0605241	-0.0741971	-0.00937157	0.00791934	-0.0336189
	6		37	41	34	46	35	32	27	40	45	28	31	51	51	28	21	28	28	20	78	77	77	21	46	45	71			6	-0.0417521	0.0163605	0.00123951	0.101631	0.0312463	0.0342766	-0.0713446	-0.0096665	0.111391	-0.115951	-0.0834598	0.136618	0.13759	-0.0566857	-0.136245	-0.089437	-0.0393348	-0.209565	0.0196266
	7		27	19	33	36	35	25	26	39	38	39	46	29	29	16	29	48	34	44	90	92	93	16	63	72	38			7	-0.17859	-0.31767	-0.0117255	-0.00482394	0.0312463	-0.0729333	-0.087735	-0.0206619	0.0379623	0.0279551	0.0879363	-0.108555	-0.107582	-0.299724	0.0039339	0.144646	0.0449861	0.132858	0.0817745
	8		44	41	36	35	35	23	28	55	40	37	36	36	36	35	29	38	38	27	72	72	73	17	85	81	78			8	0.0334988	0.0163605	0.0260631	-0.0170584	0.0312463	-0.109146	-0.0555503	0.128636	0.0602387	0.0050922	-0.018519	-0.01465	-0.0136774	0.0402243	0.0039339	0.0431885	0.0932908	-0.0792308	-0.0151355
	9		30	32	26	24	32	34	45	51	18	35	31	30	30	27	29	33	27	35	74	73	73	14	77	80	87			9	-0.132833	-0.0912734	-0.115266	-0.180915	-0.00767178	0.0606056	0.150504	0.0958437	-0.286549	-0.0190415	-0.0834598	-0.0938313	-0.0928586	-0.07248	0.0039339	-0.0180811	-0.0551291	0.0334734	-0.00323632
	10		64	57	31	34	32	26	24	48	42	40	46	47	47	37	31	47	36	34	62	62	62	20	61	63	75			10	0.196226	0.159452	-0.0388777	-0.0296475	-0.00767178	-0.0559	-0.122497	0.0695147	0.081428	0.0389505	0.0879363	0.101145	0.102118	0.0643579	0.0328976	0.135503	0.0698097	0.0208843	-0.0800763
	11		38	39	26	28	31	18	24	27	26	24	30	19	19	20	24	39	34	48	75	75	73	12	71	67	69			11	-0.0301703	-0.00535874	-0.115266	-0.113968	-0.0214601	-0.215601	-0.122497	-0.180363	-0.126848	-0.182898	-0.0977003	-0.292199	-0.291226	-0.202814	-0.0782529	0.0544696	0.0449861	0.170647	0.00259323
	12		38	42	40	32	27	33	28	38	38	26	32	40	39	22	25	38	30	41	82	82	84	22	88	88	81			12	-0.0301703	0.0268259	0.0718206	-0.0559765	-0.081458	0.0476406	-0.0555503	-0.0319429	0.0379623	-0.148136	-0.0696716	0.0311075	0.0210847	-0.161421	-0.0605241	0.0431885	-0.00937157	0.102189	0.0413458
		Total number of genes	489	474	407	437	391	355	382	491	418	439	451	447	446	383	345	413	368	389	895	896	896	230	898	891	877
Cloud	1		10	14	24	13	4	10	14	33	35	4	5	3	3	12	35	32	34	41	1	1	3	31	23	31	49		Cloud	1	-0.175918	-0.0862708	0.242082	0.0597594	-0.467804	0.273175	0.200177	0.399212	0.400707	-0.017555	0.0623217	-0.206952	-0.206952	-0.01465	0.0424981	-0.10034	-0.129529	-0.032137	-0.335618
	2		15	24	6	12	10	10	17	4	18	4	2	0	0	19	38	55	48	53	2	2	2	38	29	31	33			2	0.000173753	0.147812	-0.359978	0.0249973	-0.0698641	0.273175	0.284498	-0.517242	0.111911	-0.017555	-0.335618	#NUM!	#NUM!	0.184922	0.0782136	0.134872	0.0202335	0.079355	-0.0345884
	3		29	23	24	13	37	13	22	15	14	5	6	6	6	17	29	46	57	59	2	2	2	41	32	29	37			3	0.28648	0.129329	0.242082	0.0597594	0.498338	0.387118	0.396472	0.0567892	0.00276656	0.079355	0.141503	0.0940783	0.0940783	0.136618	-0.039172	0.0572675	0.0948672	0.125931	-0.0345884
	4		14	9	13	16	15	2	8	13	13	1	11	14	14	15	30	50	43	43	1	1	1	50	18	41	51			4	-0.0297895	-0.278156	-0.0241856	0.149936	0.106227	-0.425795	-0.0428609	-0.00535874	-0.0294181	-0.619615	0.404744	0.462055	0.462055	0.08226	-0.0244487	0.0934796	-0.0275392	-0.0114524	-0.335618
	5		10	16	16	11	37	7	7	11	18	3	4	9	9	7	28	43	62	40	3	2	2	50	40	49	33			5	-0.175918	-0.0282789	0.065991	-0.0127912	0.498338	0.118273	-0.100853	-0.0779094	0.111911	-0.142494	-0.0345884	0.27017	0.27017	-0.248733	-0.0544119	0.0279781	0.131384	-0.0428609	0.141503
	6		23	19	22	10	2	3	9	19	15	10	7	7	7	8	38	49	51	49	2	3	3	34	30	37	28			6	0.18581	0.0463547	0.204294	-0.0541839	-0.768834	-0.249704	0.00829164	0.159452	0.0327298	0.380385	0.20845	0.161025	0.161025	-0.190741	0.0782136	0.0847057	0.0465625	0.0452752	-0.0345884
	7		31	39	13	9	9	2	2	17	18	11	11	8	8	40	47	45	60	54	6	4	3	30	23	24	27			7	0.315444	0.358666	-0.0241856	-0.0999414	-0.115622	-0.425795	-0.644921	0.111147	0.111911	0.421778	0.404744	0.219017	0.219017	0.508229	0.170528	0.0477222	0.117144	0.0874729	0.442533
	8		6	6	6	9	9	2	1	15	3	1	2	1	1	2	22	37	33	52	3	3	2	35	28	34	21			8	-0.397766	-0.454248	-0.359978	-0.0999414	-0.115622	-0.425795	-0.945951	0.0567892	-0.66624	-0.619615	-0.335618	-0.684073	-0.684073	-0.792801	-0.159147	-0.0372886	-0.142494	0.0710825	0.141503
	9		7	8	11	14	4	3	6	7	8	2	0	1	1	7	29	21	28	36	1	2	2	35	30	48	26			9	-0.330819	-0.329309	-0.0967363	0.0919441	-0.467804	-0.249704	-0.1678	-0.274204	-0.240271	-0.318585	#NUM!	-0.684073	-0.684073	-0.248733	-0.039172	-0.283271	-0.21385	-0.0886184	-0.335618
	10		9	17	19	16	6	2	4	6	7	1	0	0	0	7	40	46	58	65	0	0	0	24	53	66	33			10	-0.221675	-0.00194994	0.140625	0.149936	-0.291713	-0.425795	-0.343891	-0.341151	-0.298263	-0.619615	#NUM!	#NUM!	#NUM!	-0.248733	0.10049	0.0572675	0.10242	0.167992	#NUM!
	11		10	15	4	7	7	5	6	10	7	4	2	4	4	6	31	30	37	17	1	1	1	17	39	48	60			11	-0.175918	-0.0563076	-0.536069	-0.209086	-0.224766	-0.027855	-0.1678	-0.119302	-0.298263	-0.017555	-0.335618	-0.082013	-0.082013	-0.31568	-0.0102083	-0.128369	-0.092806	-0.414472	-0.335618
	12		16	15	7	6	1	5	10	8	11	4	2	5	5	9	14	30	39	21	4	8	8	37	33	54	47			12	0.0282025	-0.0563076	-0.293031	-0.276033	-1.06986	-0.027855	0.0540491	-0.216212	-0.101969	-0.017555	-0.335618	0.014897	0.014897	-0.139589	-0.355442	-0.128369	-0.0699431	-0.322702	0.266442
		Total number of genes	180	205	165	136	141	64	106	158	167	50	52	58	58	149	381	484	550	530	26	29	29	422	378	492	445
[truncated: 12 more columns]
