# Supplementary material
Source: publisher figshare collection journal article supplement (https://gsajournals.figshare.com/articles/dataset/_/14900463)
Supplement: Supplementary file 1 [file 1]

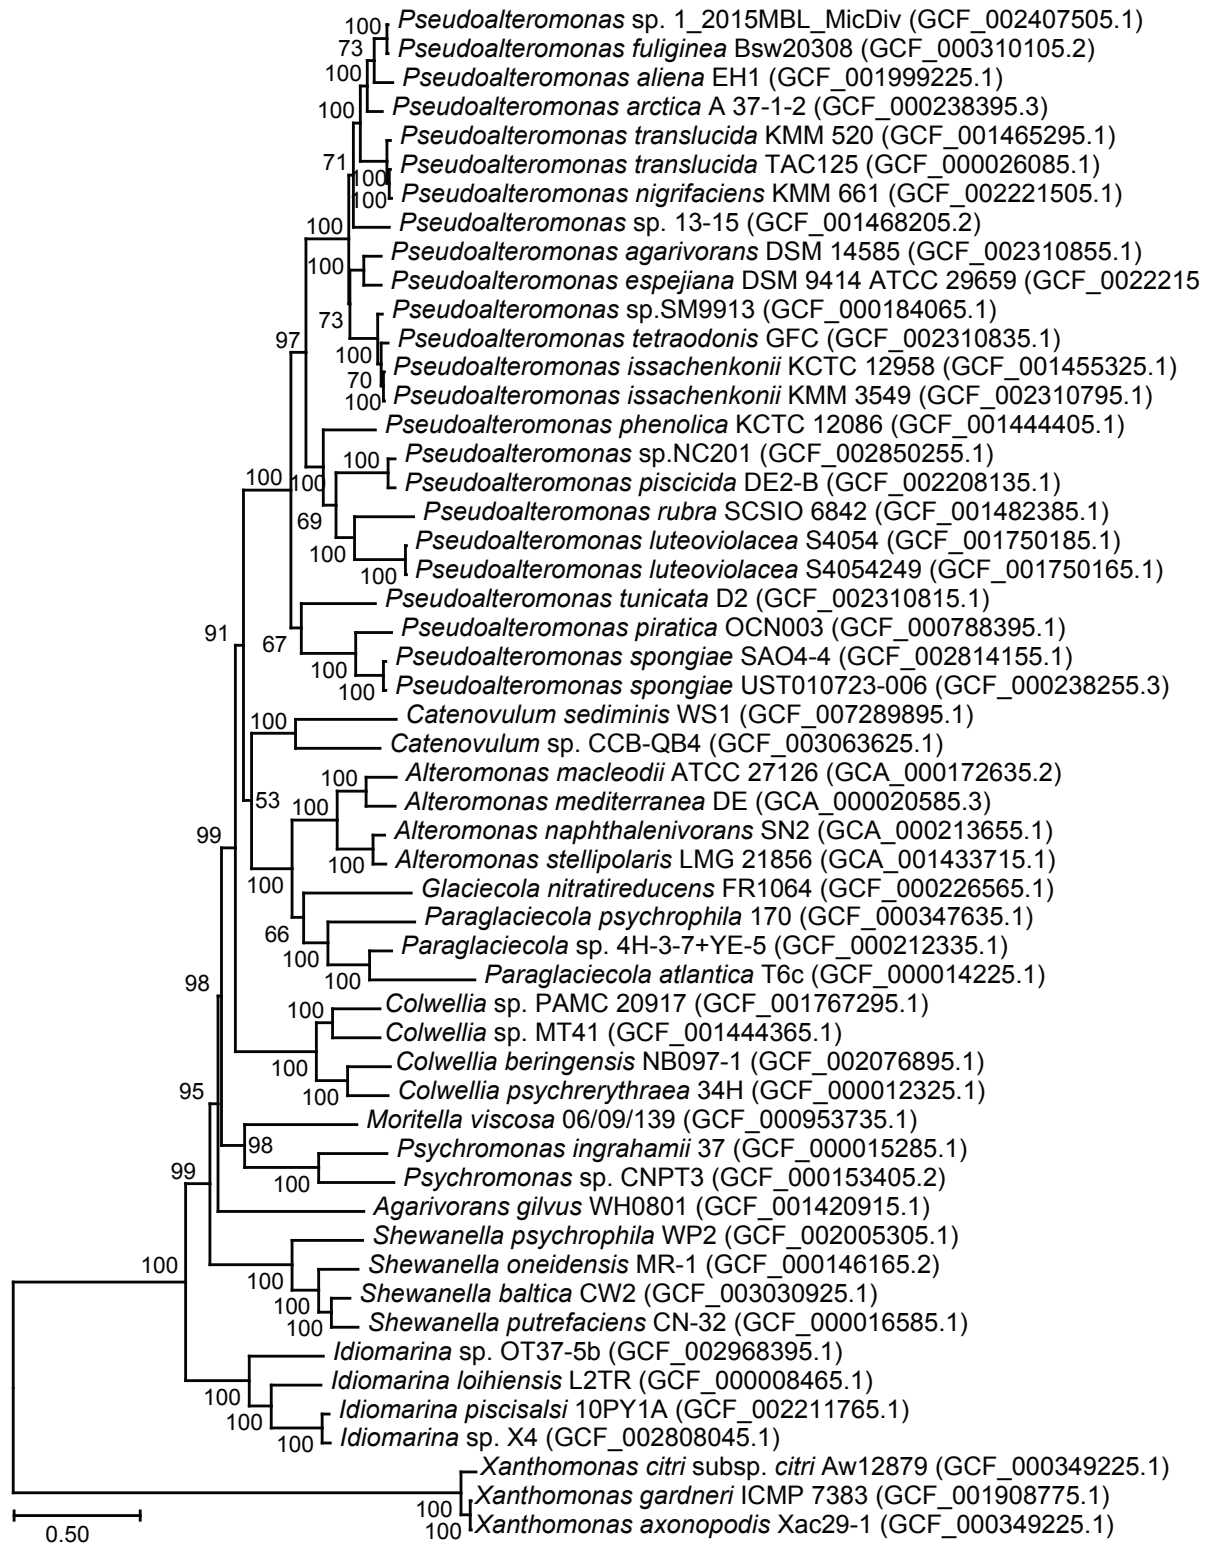

**Figure S1** Complete phylogenetic tree as shown in Figure 1.

The phylogenetic tree includes all strains in per collapsed node in Figure 1. The nucleotide sequences *gyrB*, *recA*, *rpoD*, *recN* and *topA* were aligned using MUSCLE. MEGAX was used to generate a Maximum Likelihood (ML) tree, with the settings GTR (General Time Reversible) model, Gamma Distributed with Invariant (G+I), and Bootstrap with 1,000 pseudoreplicates. RefSeq assembly accession is shown in parentheses.
